# Supplementary material for: Four novel sesquiterpenoids with their anti-Alzheimer's disease activity from Nardostachys chinensis
Source: Royal Society of Chemistry journal article supplement (doi:10.1039/c8ob02319k), 2018-01-01

## Supporting Information

### **Four novel sesquiterpenoids with their anti-Alzheimer's disease activity from *Nardostachys chinensis***

Pei-Qian Wu,<sup>a</sup> Yi-Fan Yu,<sup>a</sup> Ye Zhao,<sup>a</sup> Chun-Xue Yu,<sup>a</sup> De-Juan Zhi,<sup>a</sup> Feng-Ming Qi,<sup>b</sup>  
Dong-Qing Fei<sup>\*a,b</sup> and Zhan-Xin Zhang<sup>\*a,b</sup>

<sup>a</sup> School of Pharmacy, Lanzhou University, Lanzhou 730000, People's Republic of China. E-mail: [feidq@lzu.edu.cn](mailto:feidq@lzu.edu.cn) (D.-Q. Fei); [zhangzhx@lzu.edu.cn](mailto:zhangzhx@lzu.edu.cn) (Z.-X. Zhang);  
Fax: +86 931 8915686; Tel: +86 931 8915686

<sup>b</sup> State Key Laboratory of Applied Organic Chemistry, Lanzhou University, Lanzhou 730000, People's Republic of China

## Supporting Information Contents

- Fig. 1S**  $^1\text{H}$  NMR (600 MHz,  $\text{CDCl}_3$ ) of compound **1**
- Fig. 2S**  $^{13}\text{C}$  NMR and DEPT135 (150 MHz,  $\text{CDCl}_3$ ) of compound **1**
- Fig. 3S**  $^1\text{H}$ - $^1\text{H}$  COSY spectrum of compound **1**
- Fig. 4S** HSQC spectrum of compound **1**
- Fig. 5S** HMBC spectrum of compound **1**
- Fig. 6S** NOESY spectrum of compound **1**
- Fig. 7S** HRESIMS spectrum of compound **1**
- Fig. 8S** IR spectrum of compound **1**
- Fig. 9S**  $^1\text{H}$  NMR (600 MHz, acetone- $d_6$ ) of compound **2**
- Fig. 10S**  $^{13}\text{C}$  NMR and DEPT135 (150 MHz, acetone- $d_6$ ) of compound **2**
- Fig. 11S**  $^1\text{H}$ - $^1\text{H}$  COSY spectrum of compound **2**
- Fig. 12S** HSQC spectrum of compound **2**
- Fig. 13S** HMBC spectrum of compound **2**
- Fig. 14S** NOESY spectrum of compound **2**
- Fig. 15S** HRESIMS spectrum of compound **2**
- Fig. 16S** IR spectrum of compound **2**
- Fig. 17S**  $^1\text{H}$  NMR (600 MHz, acetone- $d_6$ ) of compound **3**
- Fig. 18S**  $^{13}\text{C}$  NMR and DEPT135 (150 MHz, acetone- $d_6$ ) of compound **3**
- Fig. 19S**  $^1\text{H}$ - $^1\text{H}$  COSY spectrum of compound **3**
- Fig. 20S** HSQC spectrum of compound **3**
- Fig. 21S** HMBC spectrum of compound **3**
- Fig. 22S** NOESY spectrum of compound **3**
- Fig. 23S** HRESIMS spectrum of compound **3**
- Fig. 24S** IR spectrum of compound **3**
- Fig. 25S**  $^1\text{H}$  NMR (600 MHz,  $\text{CDCl}_3$ ) of compound **4**
- Fig. 26S**  $^{13}\text{C}$  NMR and DEPT135 (150 MHz,  $\text{CDCl}_3$ ) of compound **4**
- Fig. 27S**  $^1\text{H}$ - $^1\text{H}$  COSY spectrum of compound **4**
- Fig. 28S** HSQC spectrum of compound **4**

**Fig. 29S** HMBC spectrum of compound **4**

**Fig. 30S** NOESY spectrum of compound **4**

**Fig. 31S** HRESIMS spectrum of compound **4**

**Fig. 32S** IR spectrum of compound **4**

Fig. 1S <sup>1</sup>H NMR (600 MHz, CDCl<sub>3</sub>) of compound 1

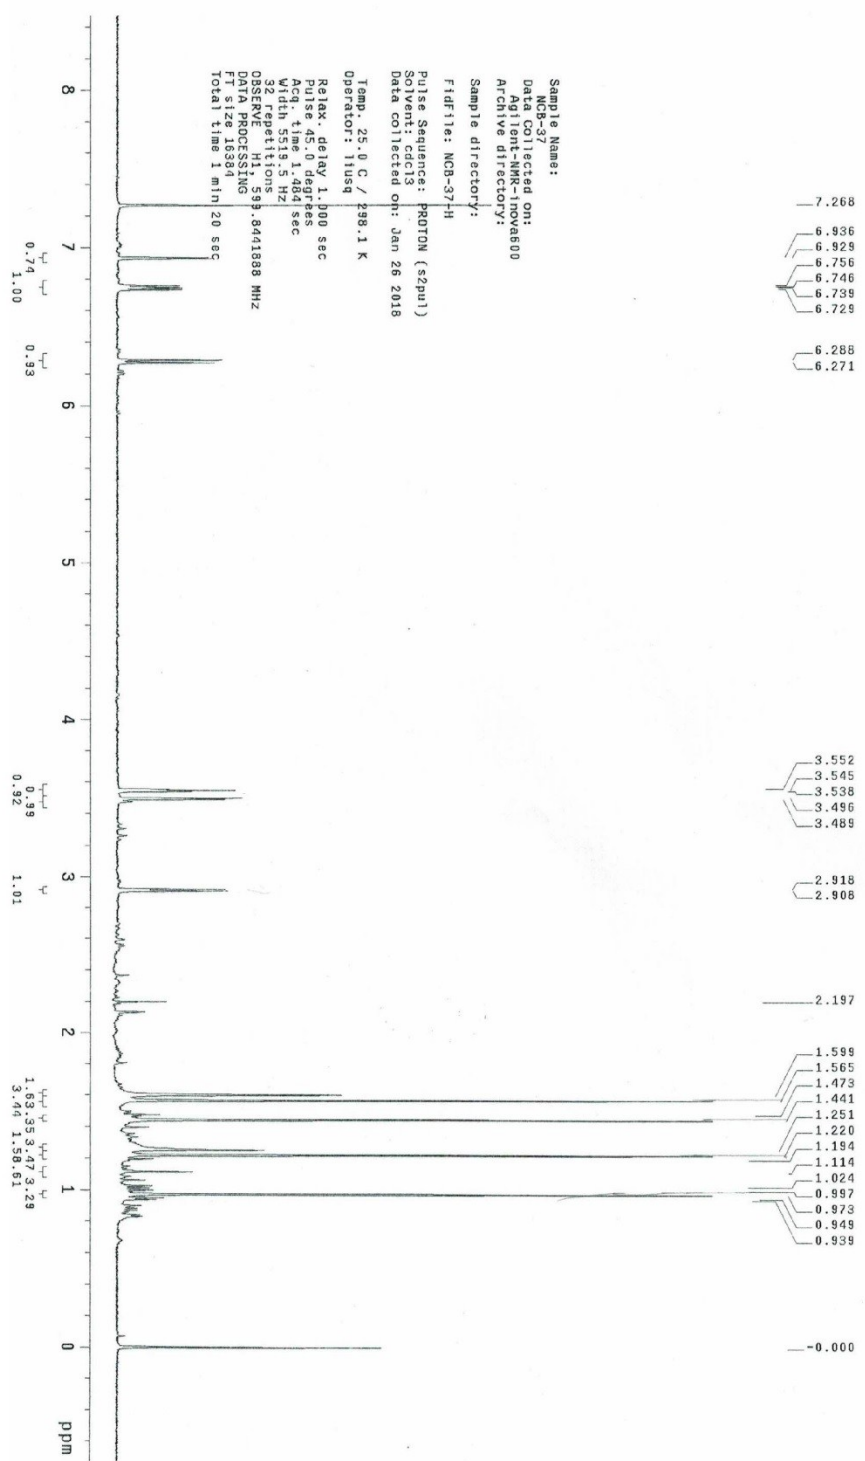

**Fig. 2S**  $^{13}\text{C}$  NMR and DEPT135 (150 MHz,  $\text{CDCl}_3$ ) of compound **1**

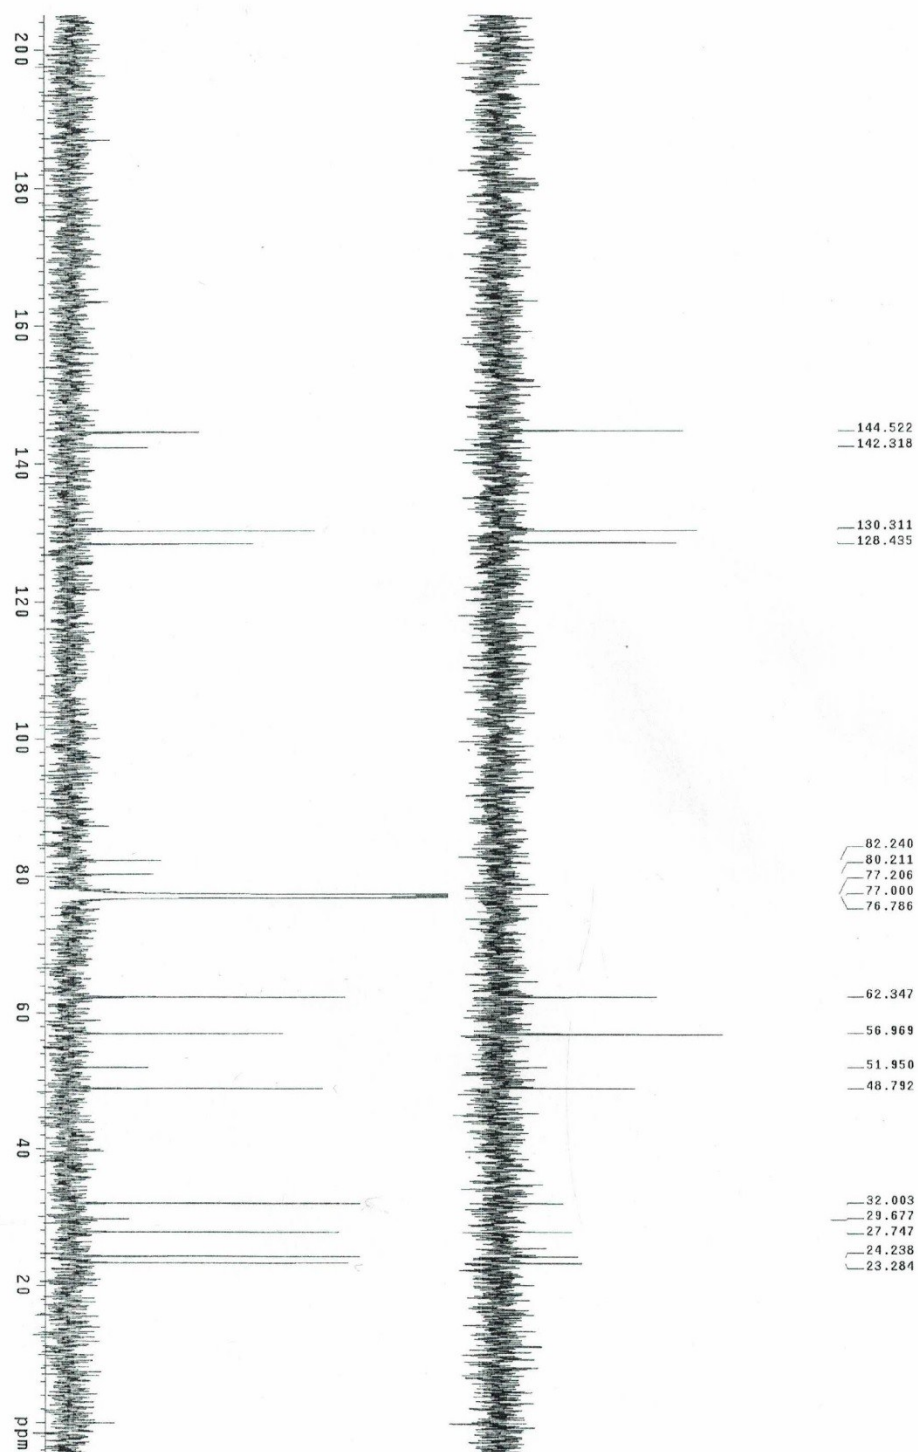

Fig. 3S  $^1\text{H}$ - $^1\text{H}$  COSY spectrum of compound 1

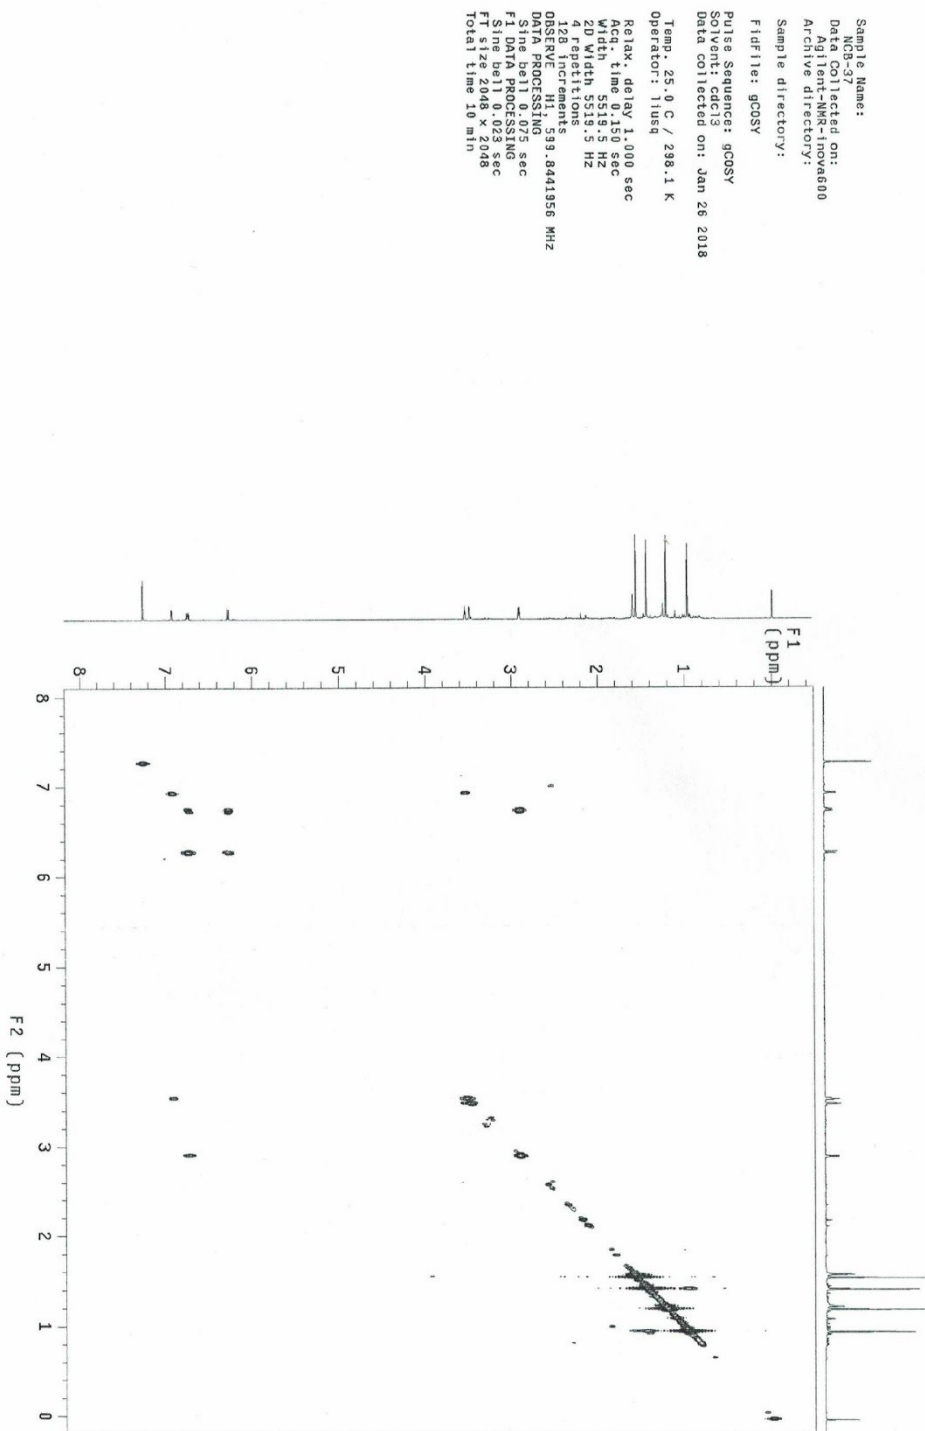

Fig. 4S HSQC spectrum of compound 1

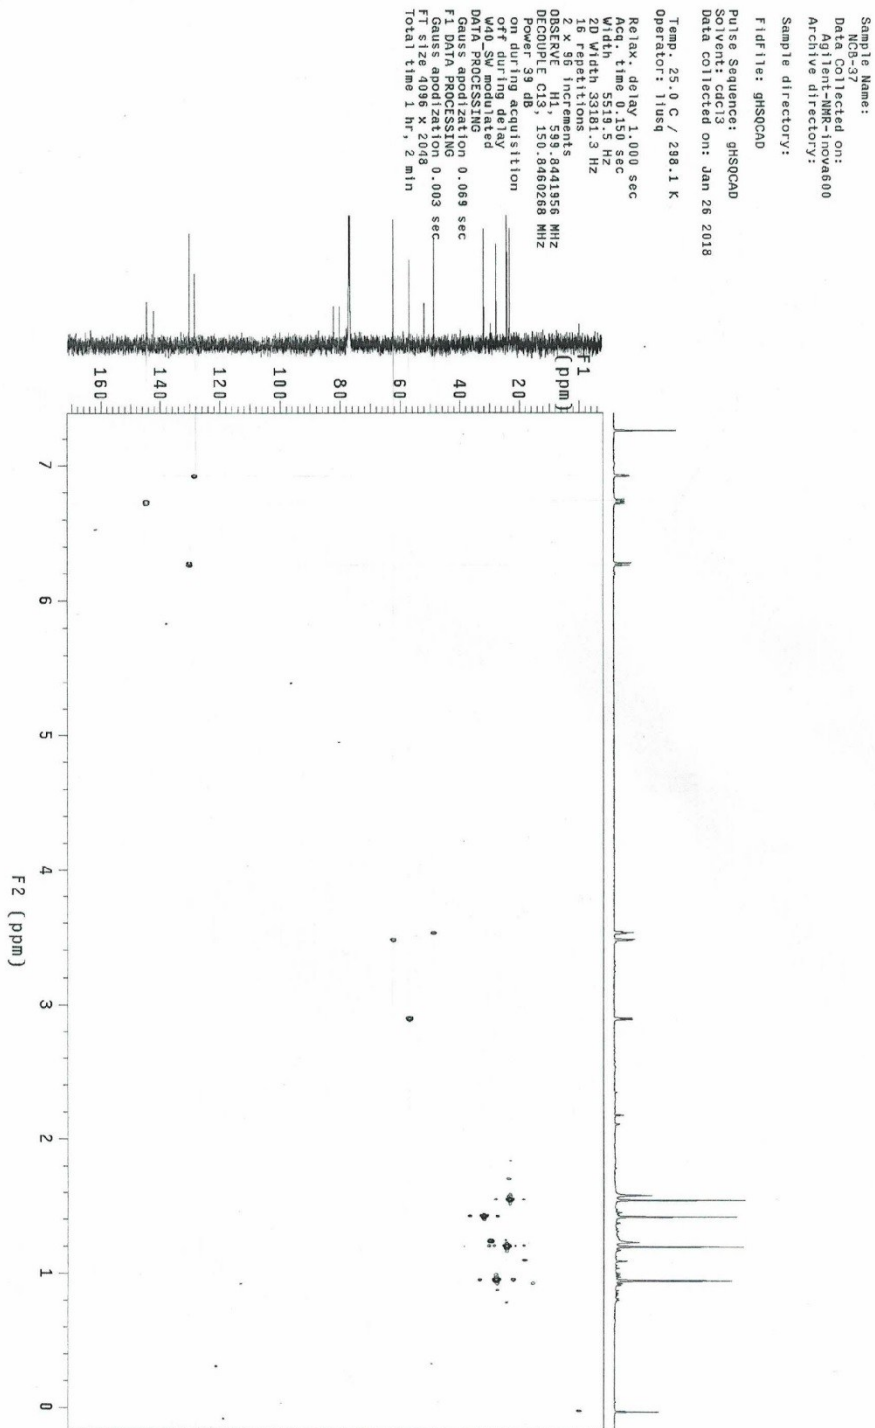

Fig. 5S HMBC spectrum of compound 1

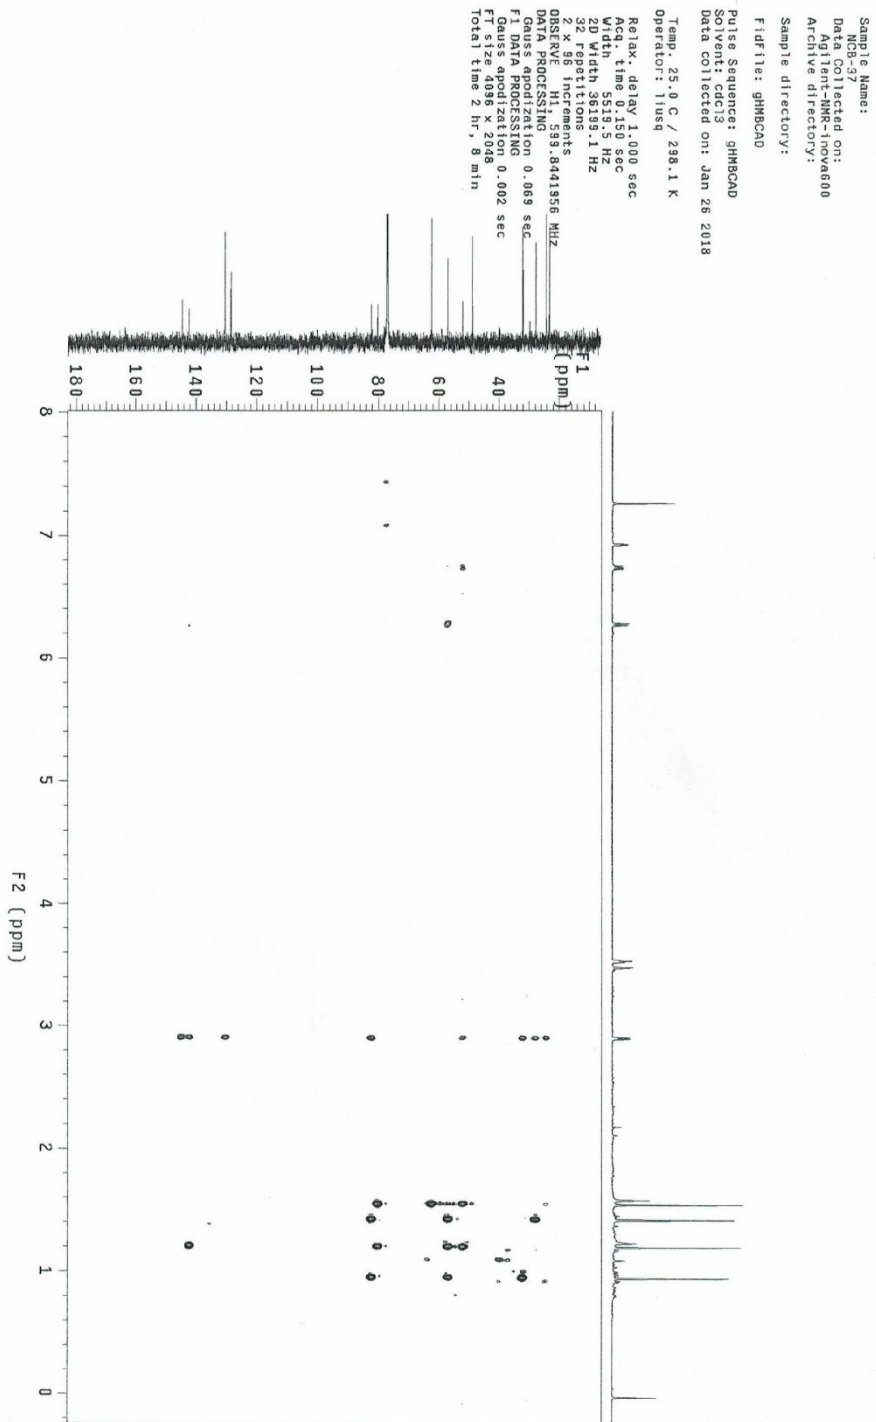



Fig. 6S NOESY spectrum of compound 1

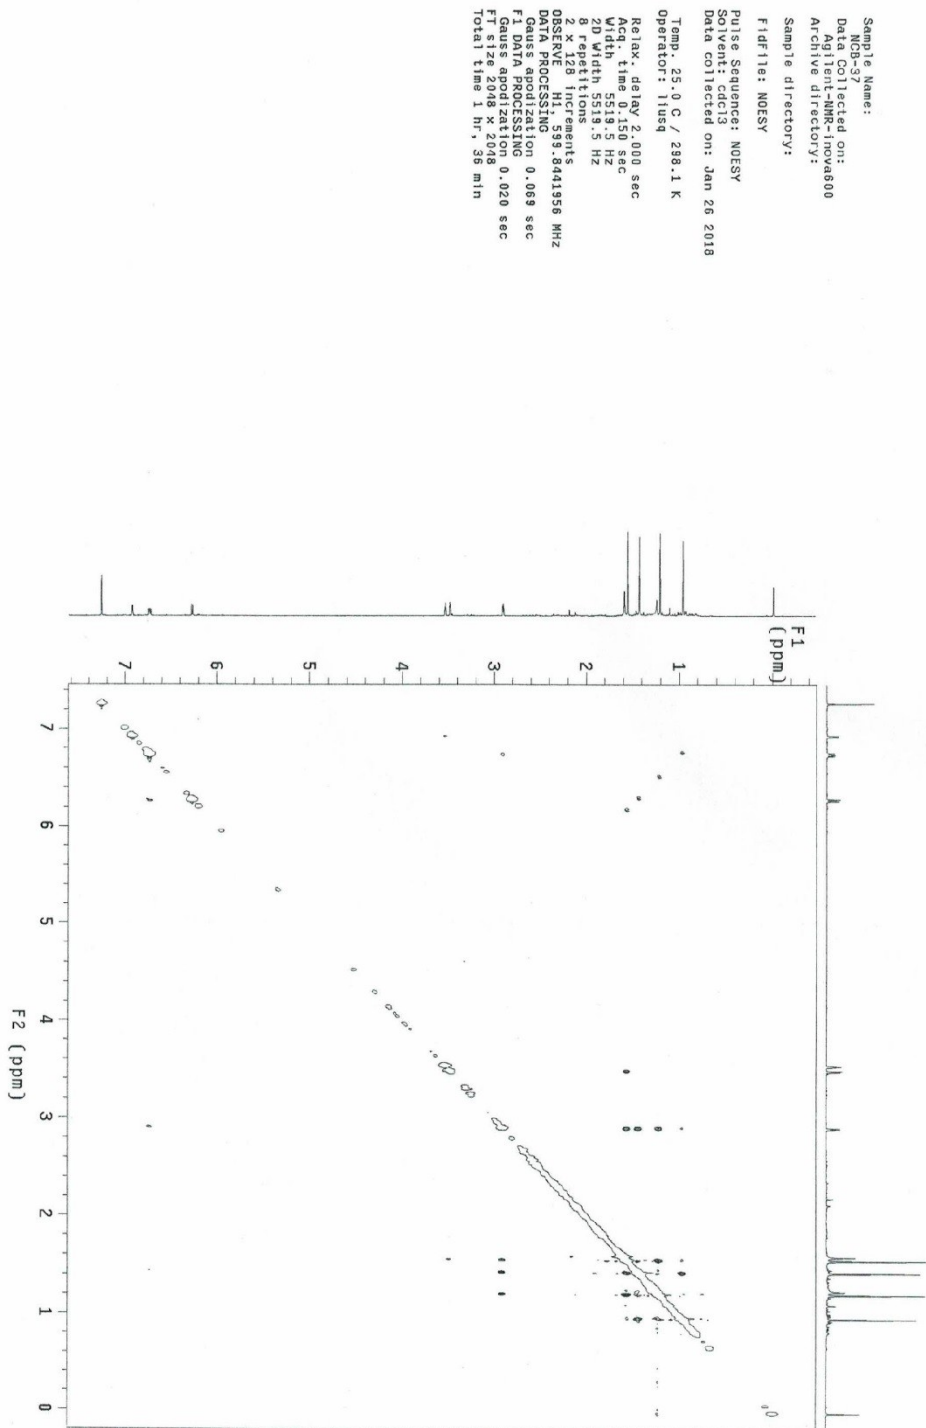

Fig. 7S HRESIMS spectrum of compound 1

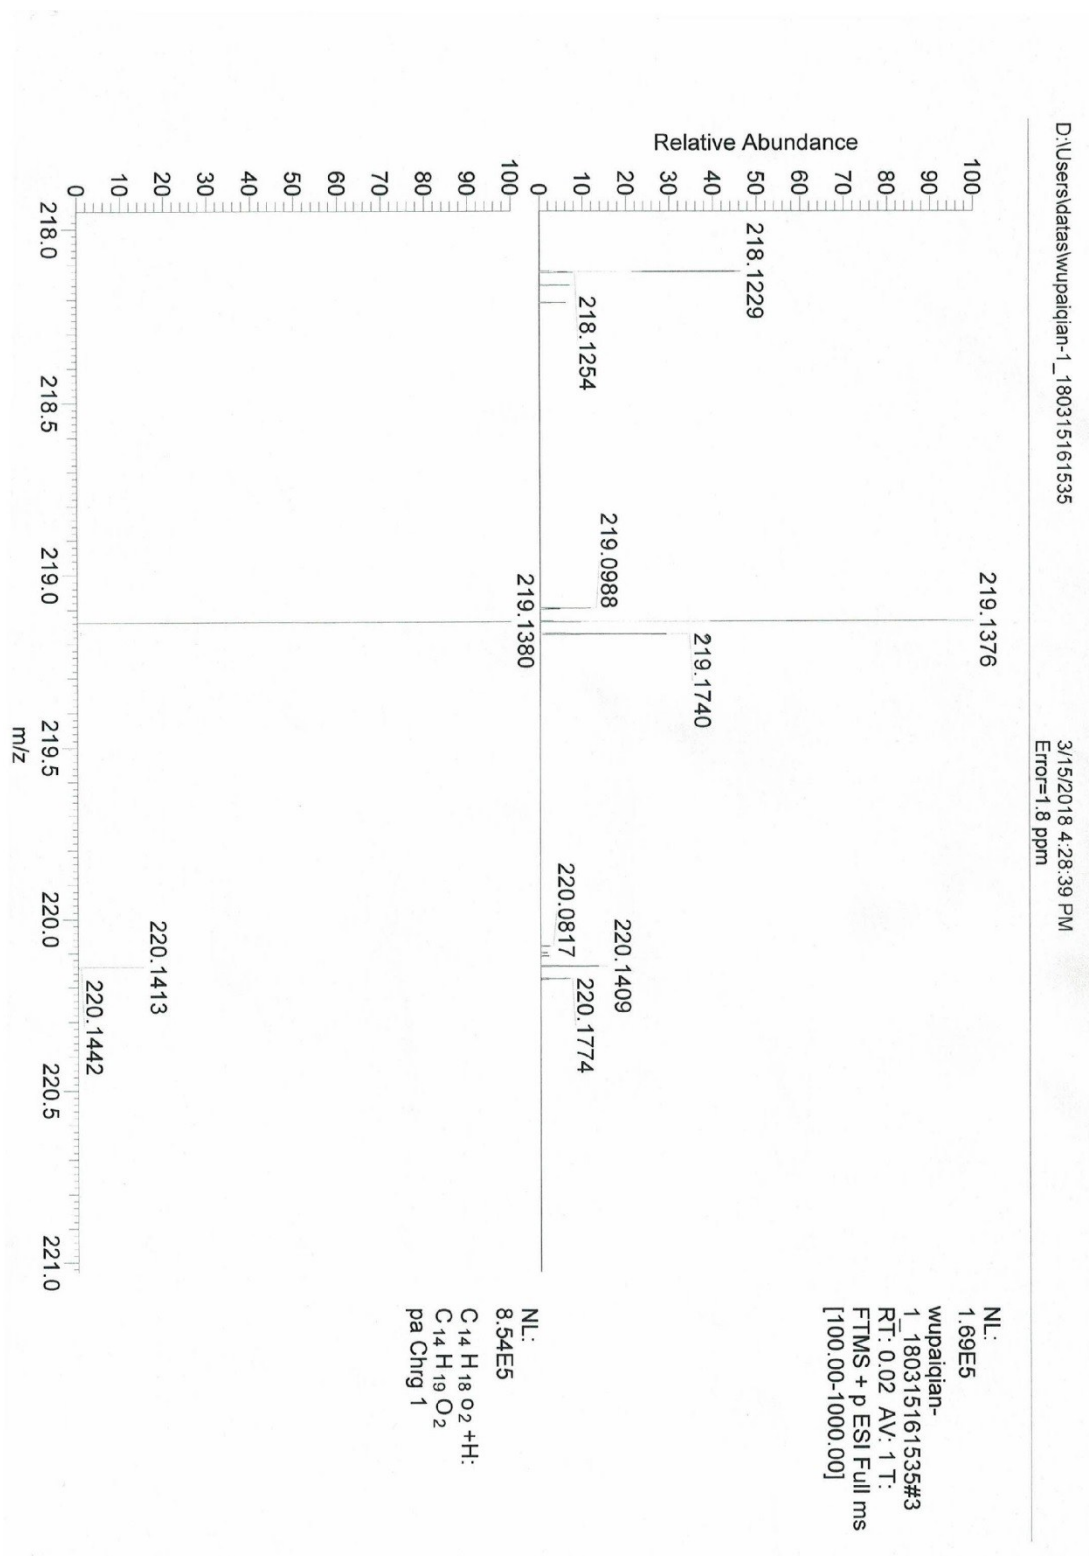

Fig. 8S IR spectrum of compound 1

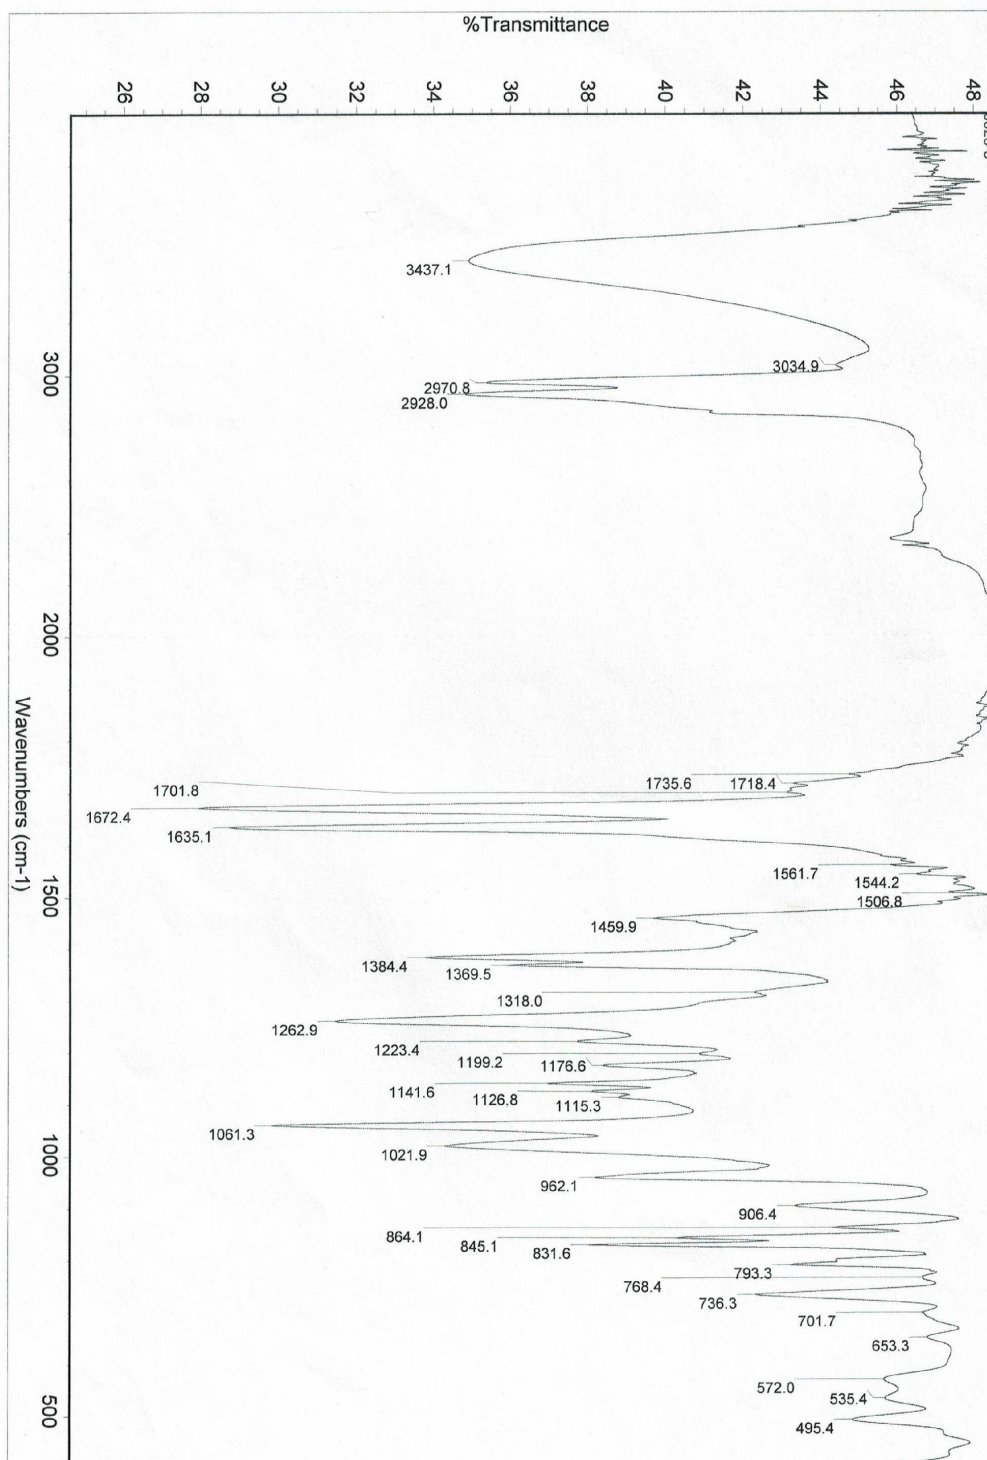

Fig. 9S  $^1\text{H}$  NMR (600 MHz, acetone- $d_6$ ) of compound 2

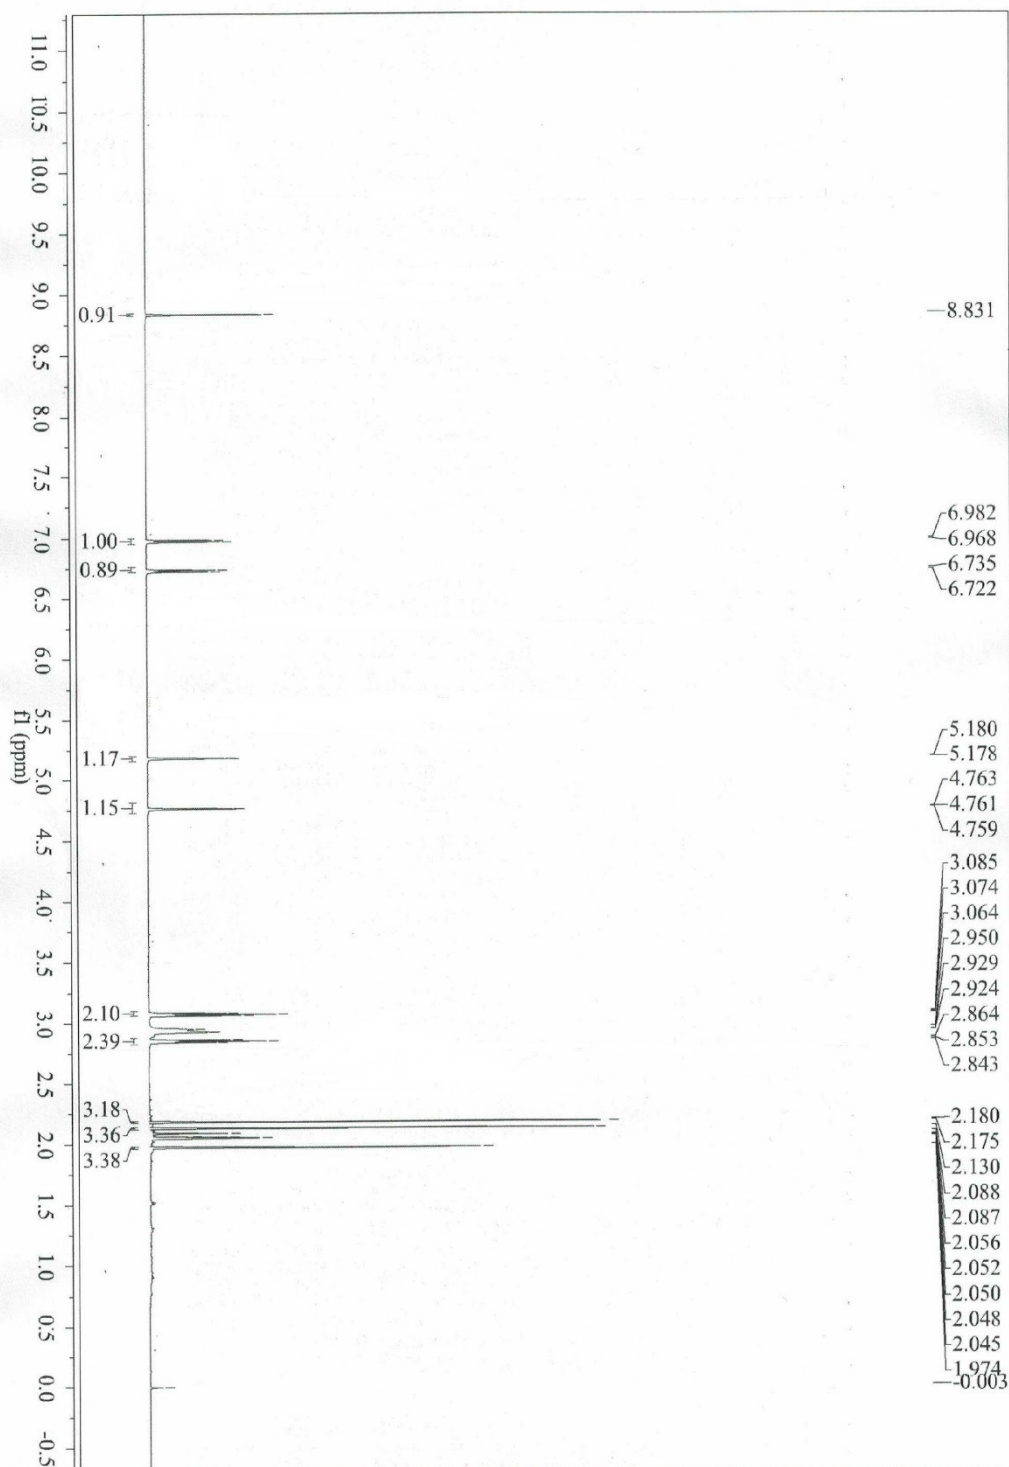

**Fig. 10S**  $^{13}\text{C}$  NMR and DEPT135 (150 MHz, acetone- $d_6$ ) of compound **2**

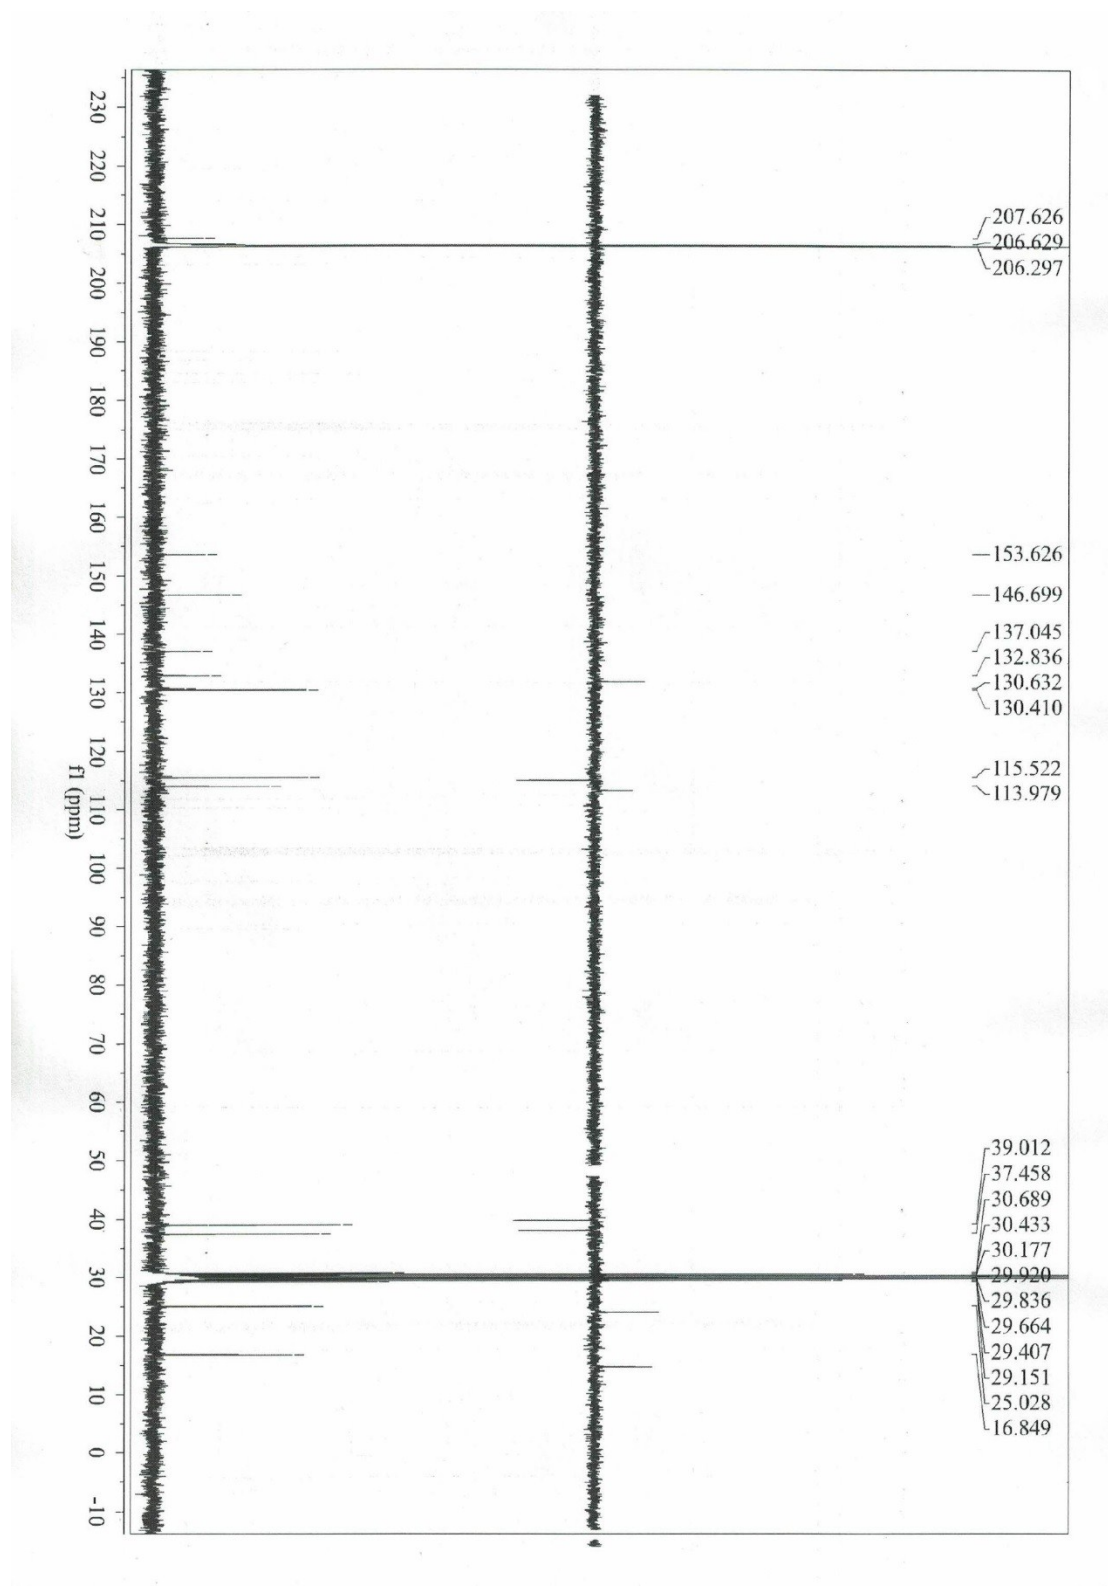

**Fig. 11S**  $^1\text{H}$ - $^1\text{H}$  COSY spectrum of compound **2**

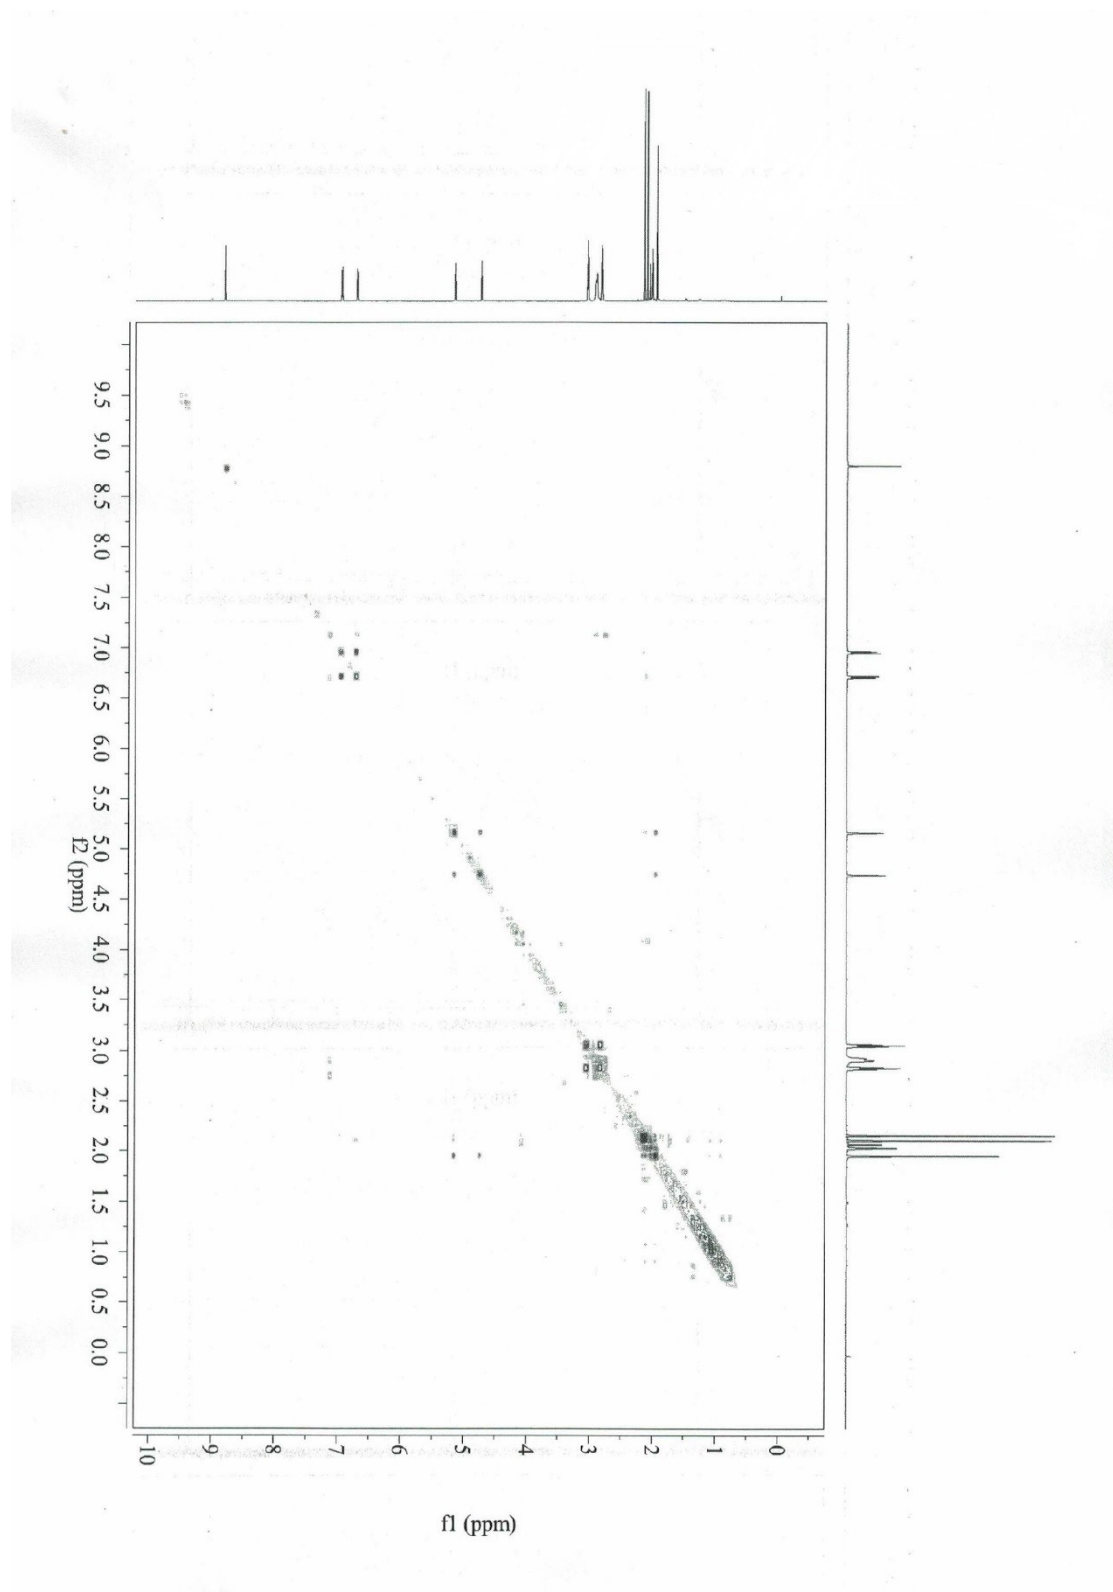

**Fig. 12S** HSQC spectrum of compound **2**

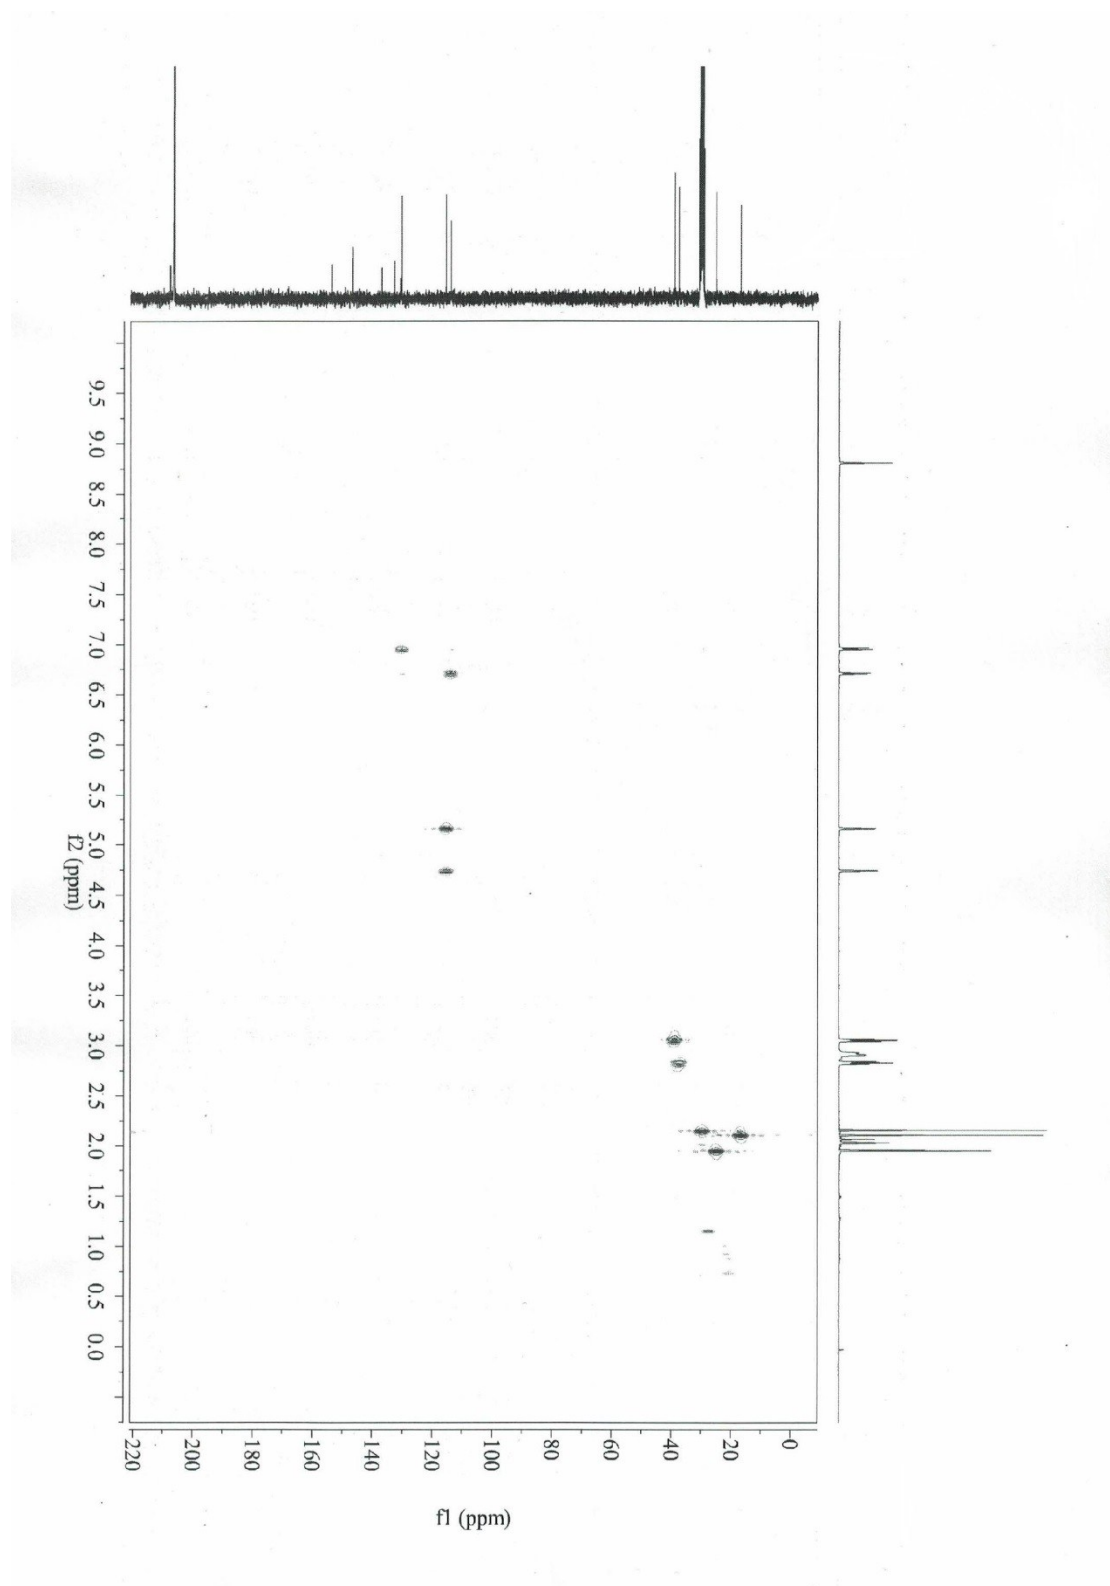

**Fig. 13S** HMBC spectrum of compound **2**

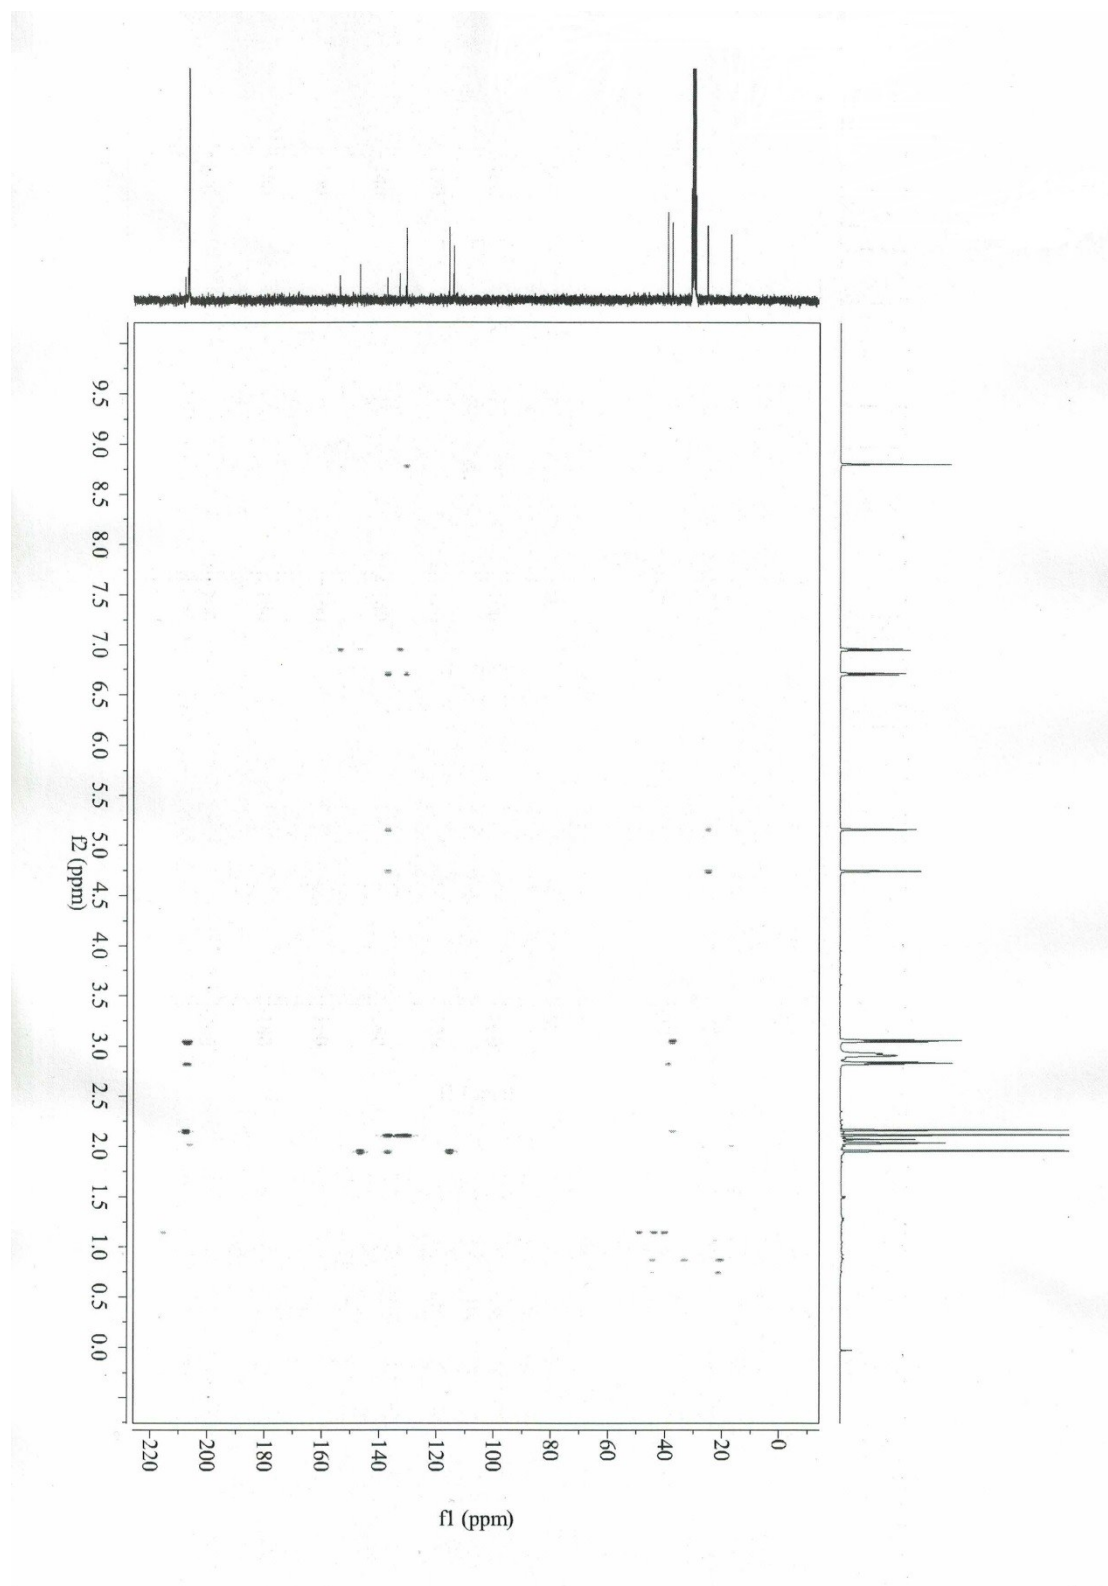



**Fig. 14S** NOESY spectrum of compound **2**

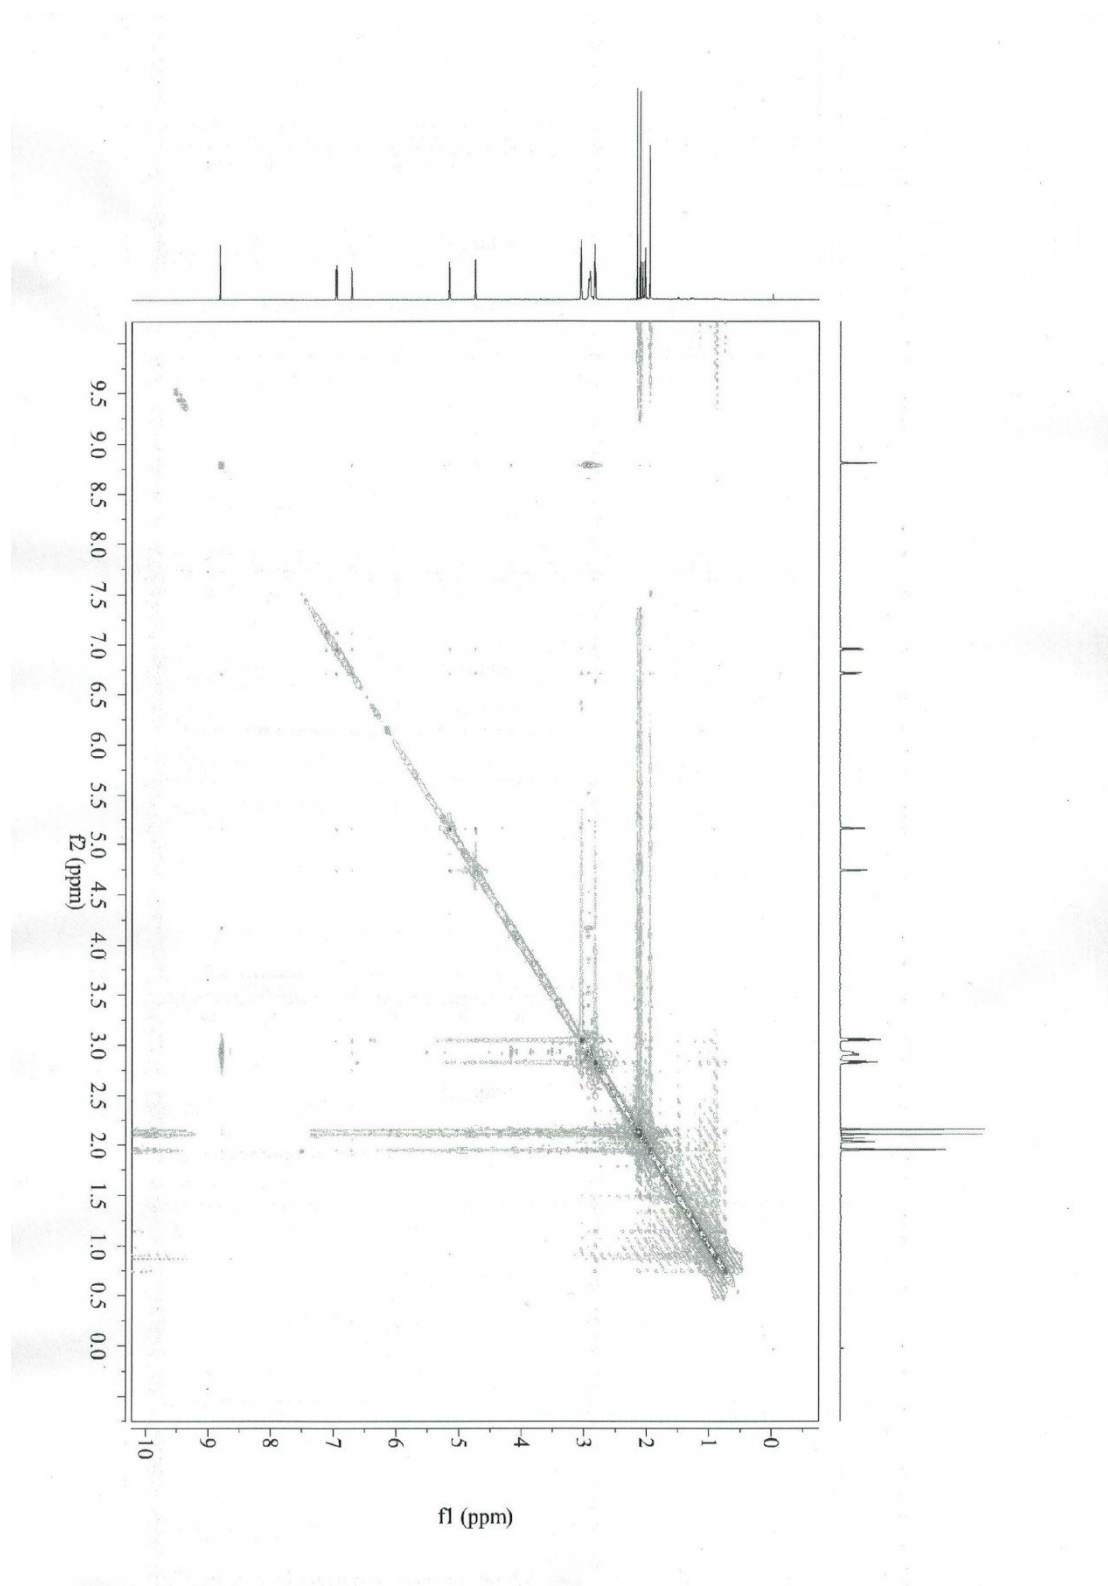

Fig. 15S HRESIMS spectrum of compound 2

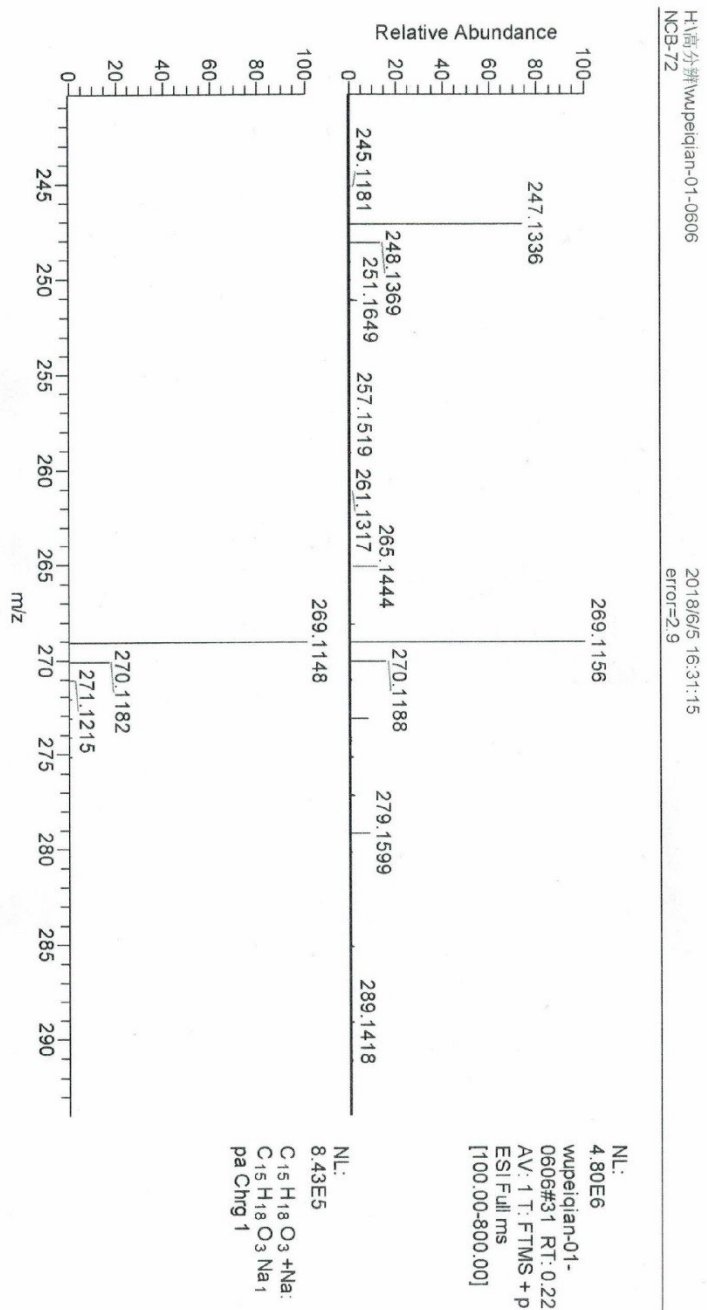

Fig. 16S IR spectrum of compound 2

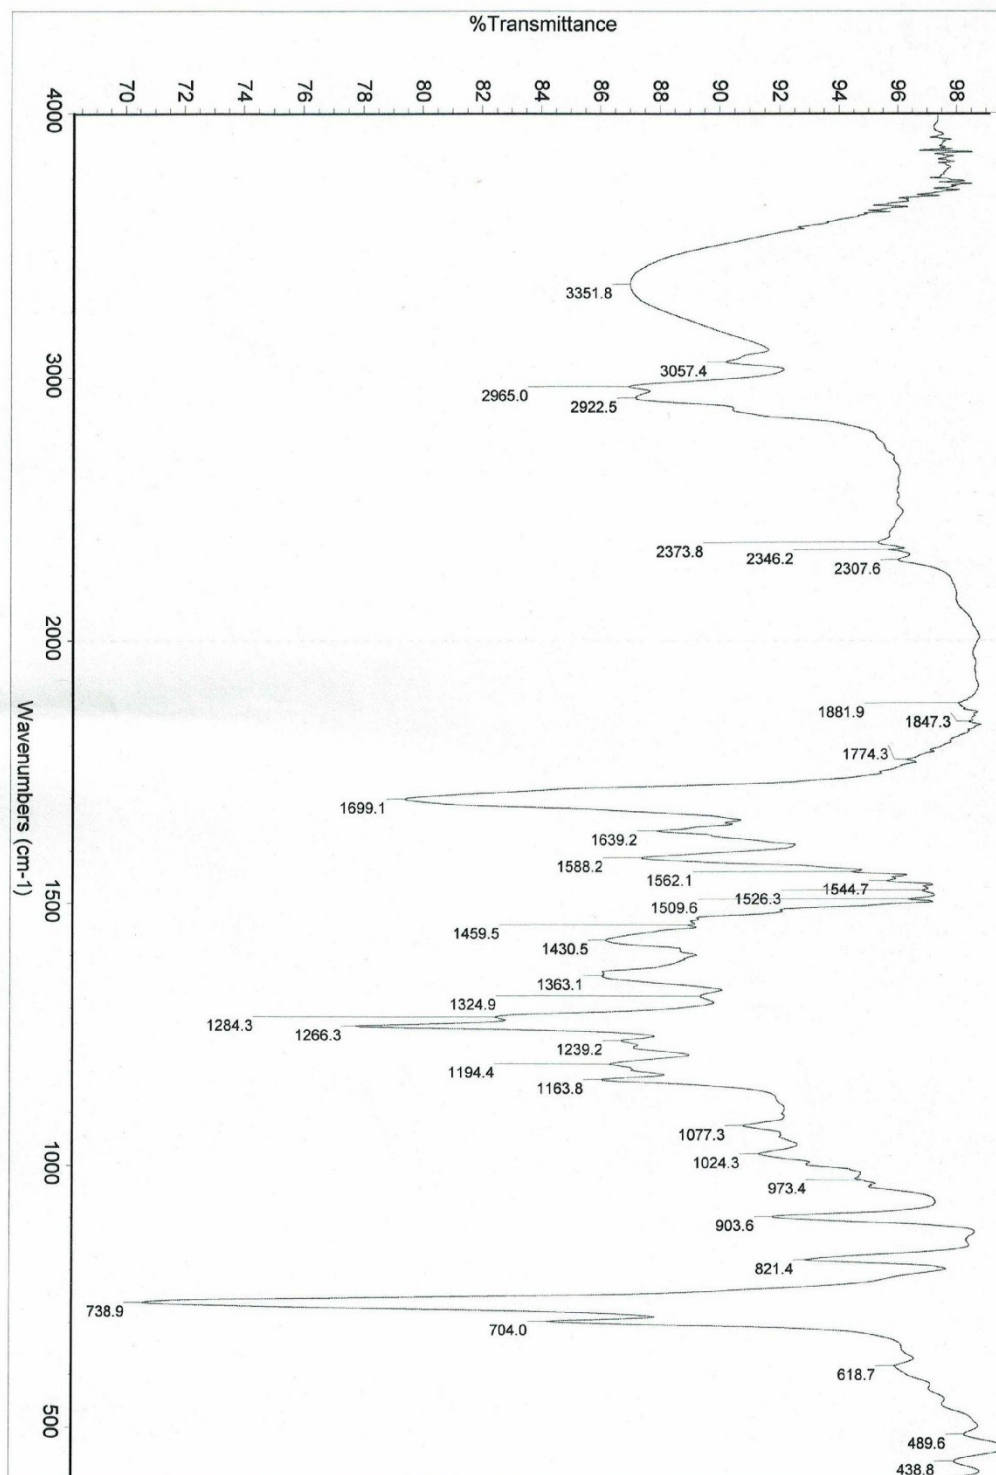

Fig. 17S <sup>1</sup>H NMR (600 MHz, acetone-*d*<sub>6</sub>) of compound 3

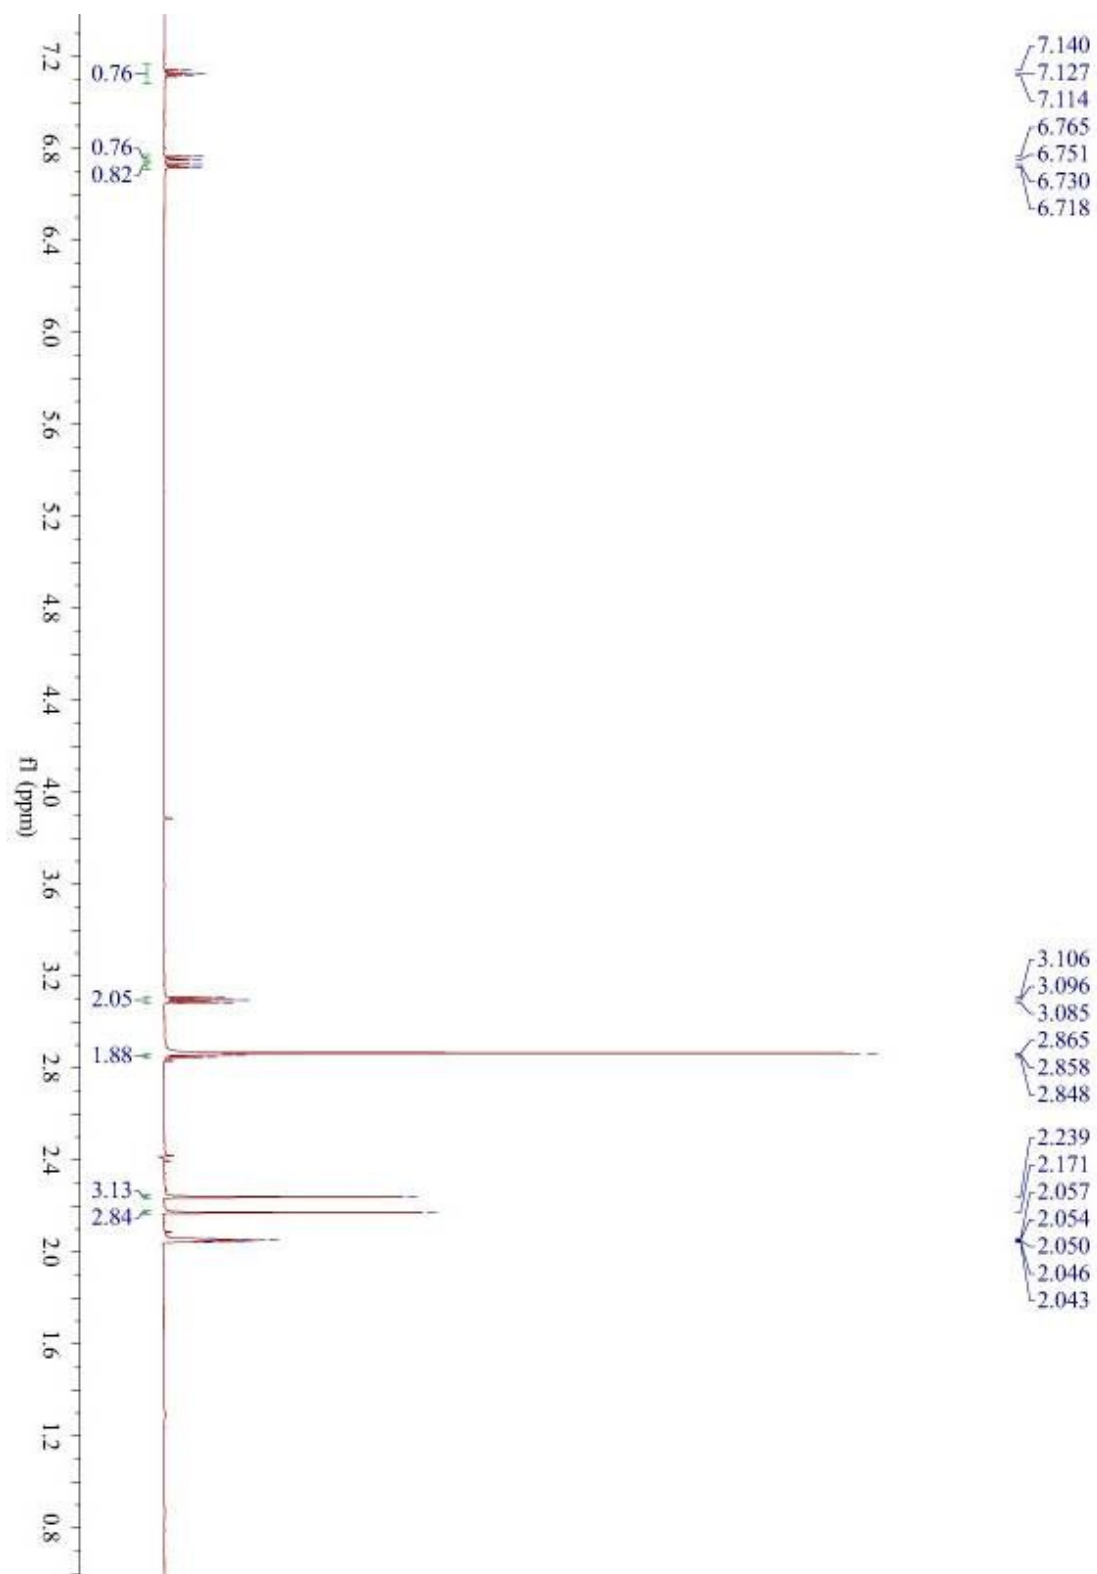

**Fig. 18S**  $^{13}\text{C}$  NMR and DEPT135 (150 MHz, acetone- $d_6$ ) of compound **3**

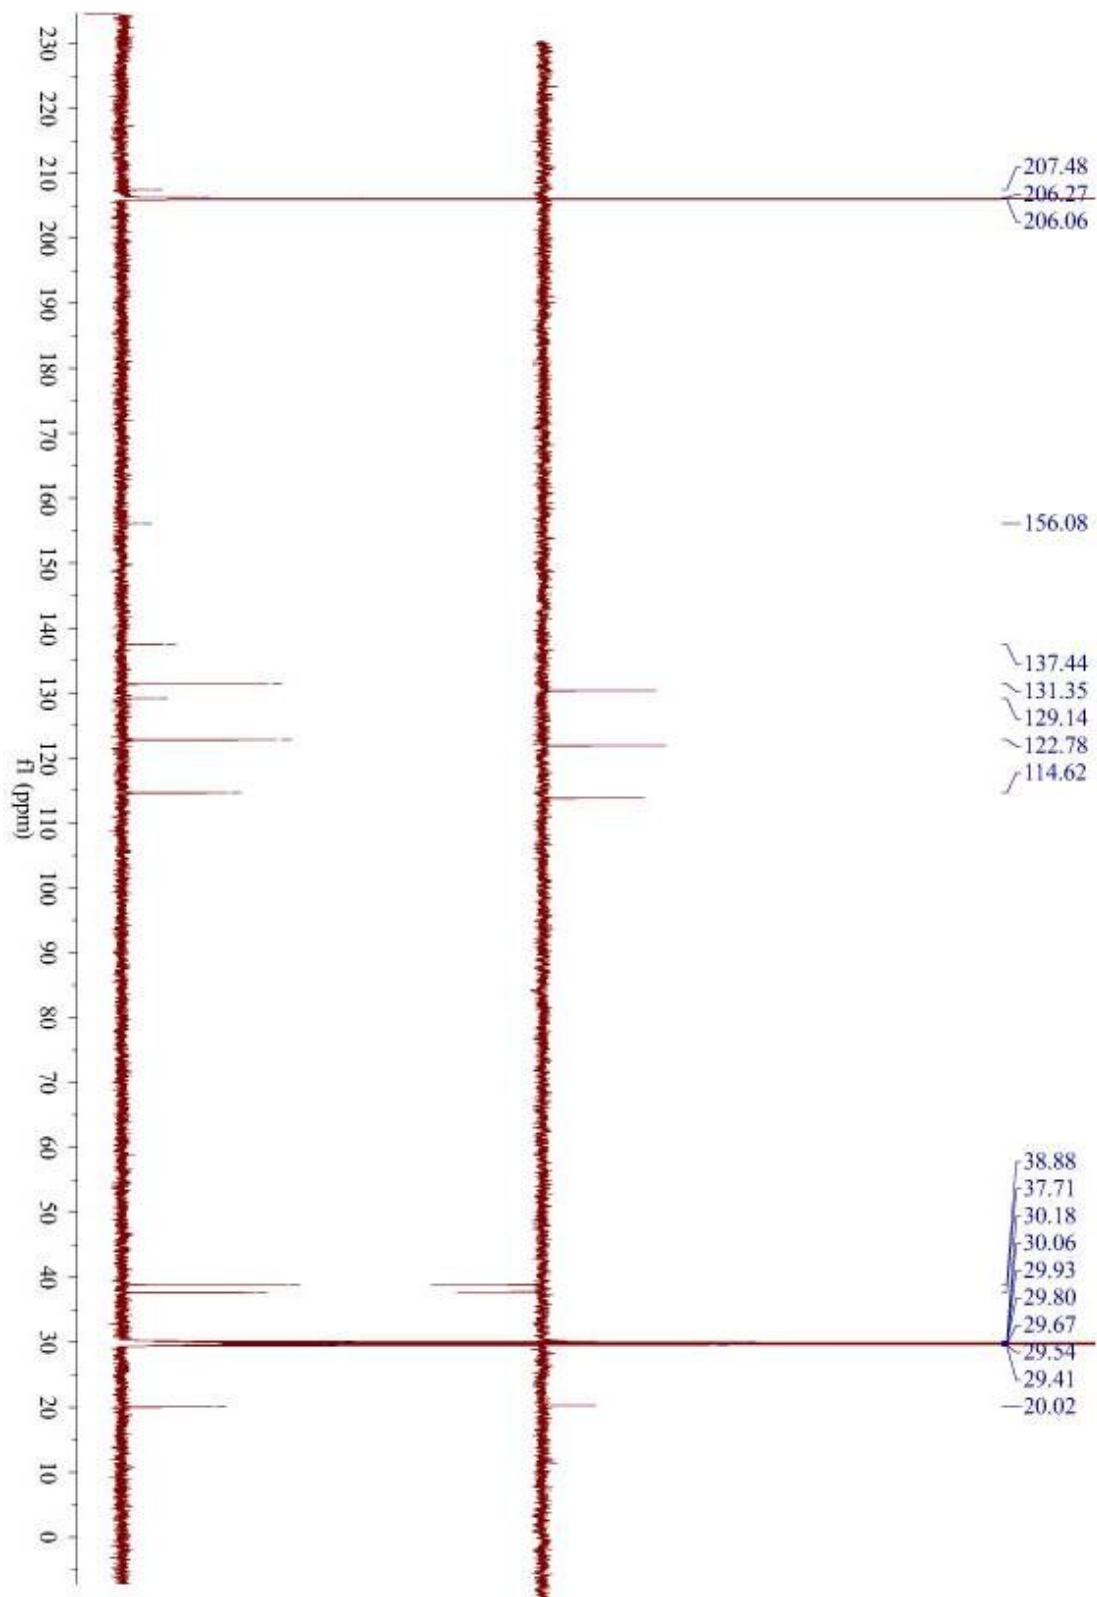

**Fig. 19S**  $^1\text{H}$ - $^1\text{H}$  COSY spectrum of compound **3**

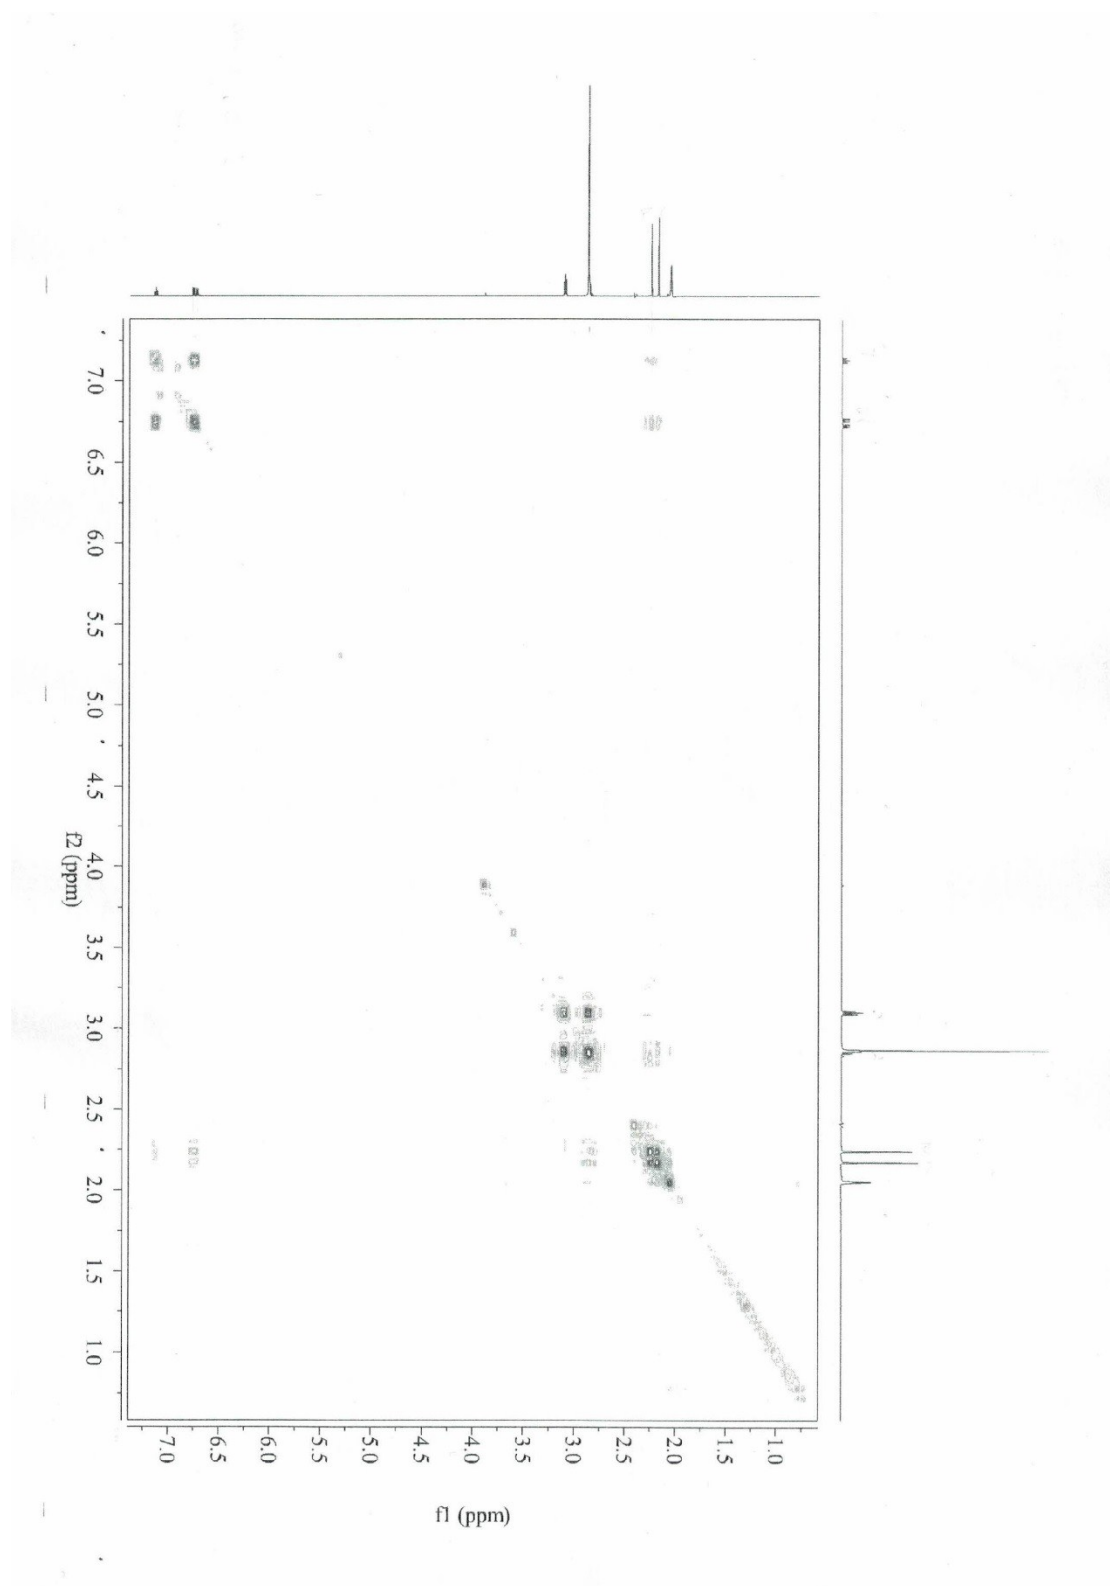

**Fig. 20S** HSQC spectrum of compound **3**

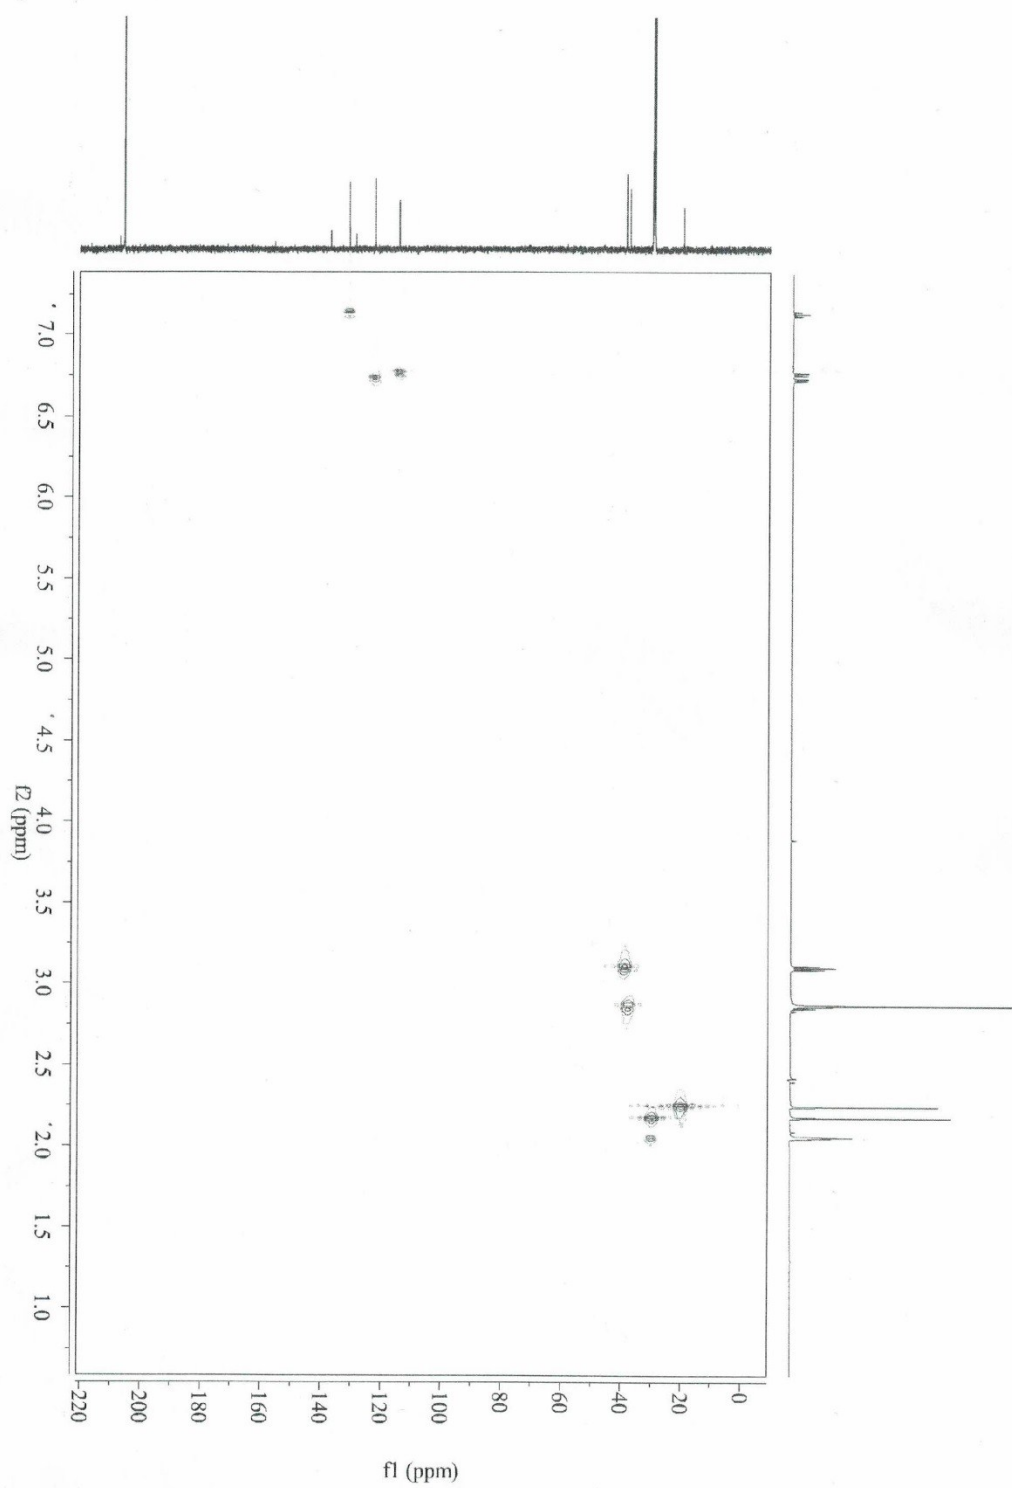

Fig. 21S HMBC spectrum of compound 3

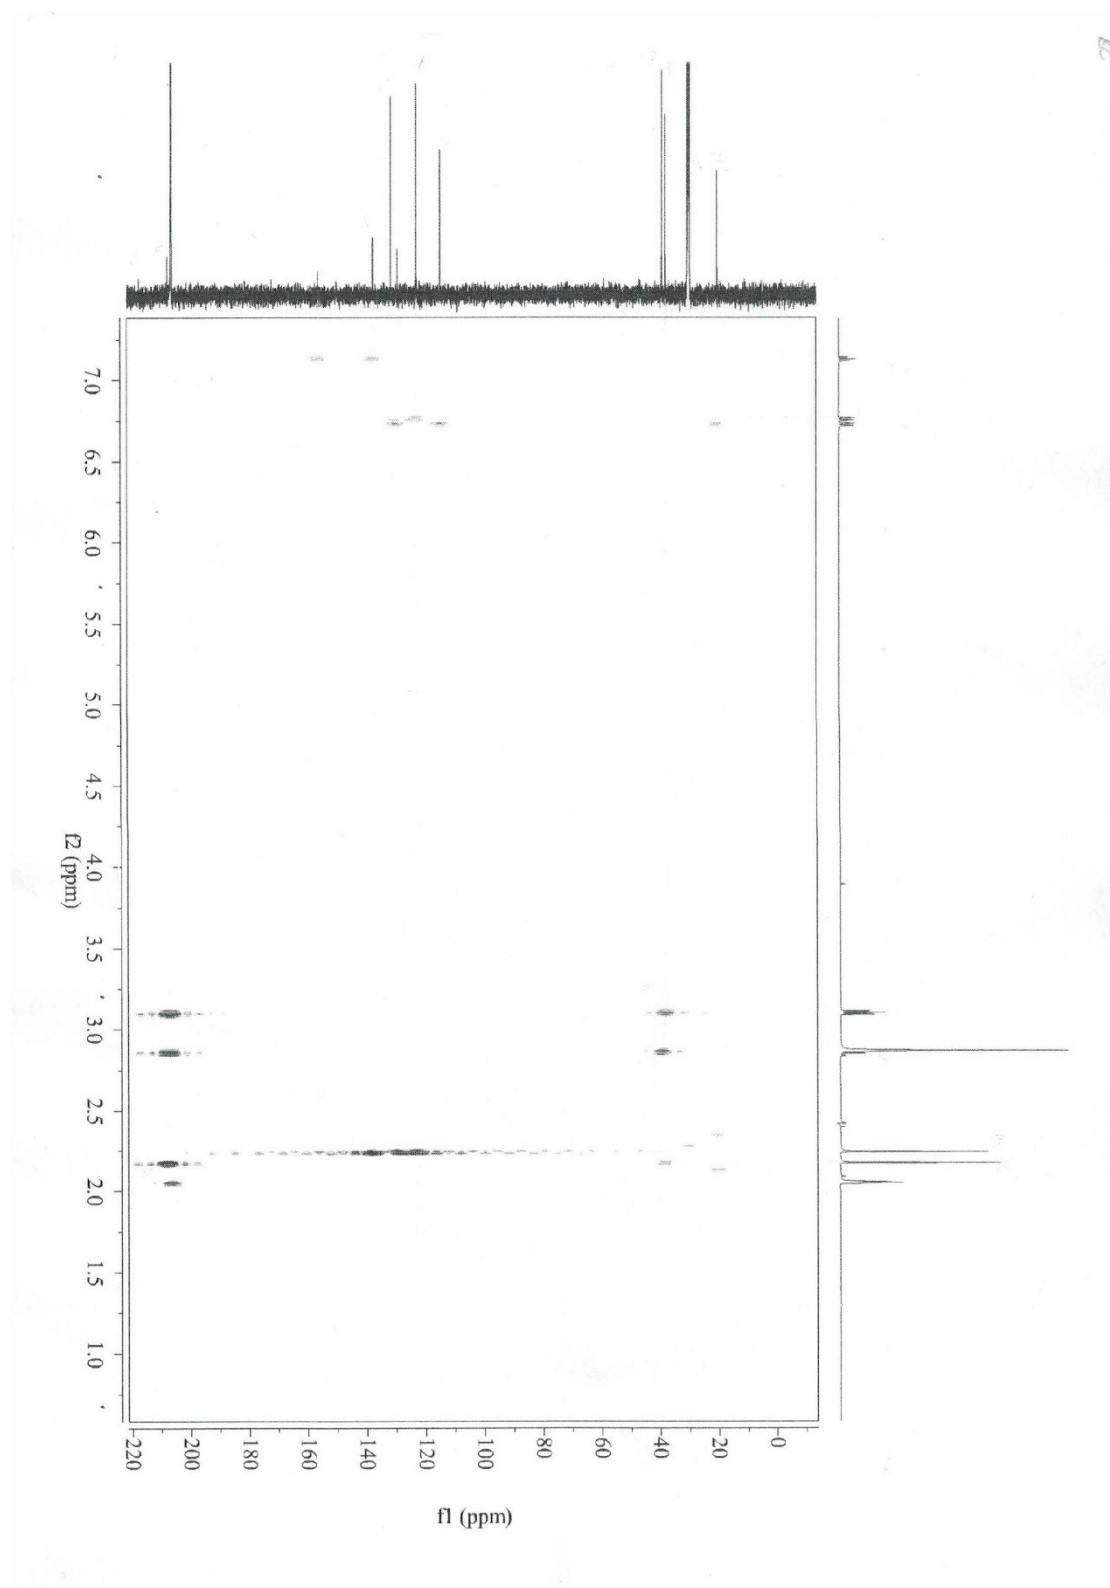



**Fig. 22S** NOESY spectrum of compound **3**

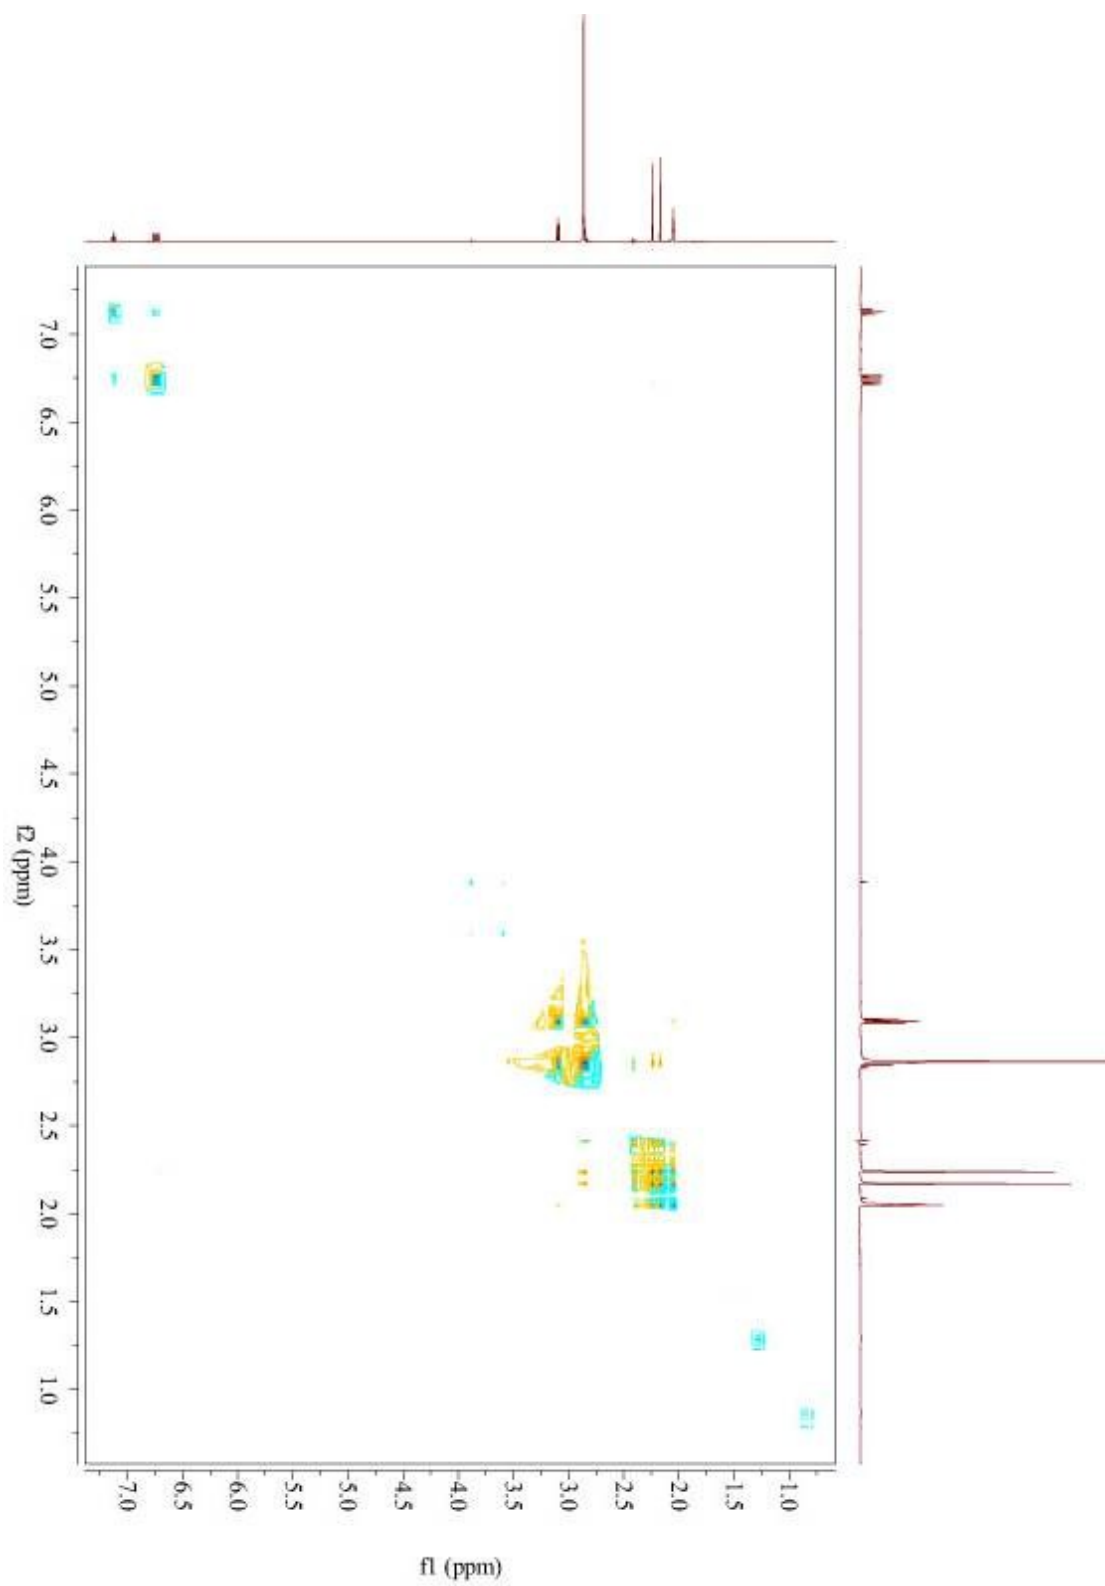

Fig. 23S HRESIMS spectrum of compound 3

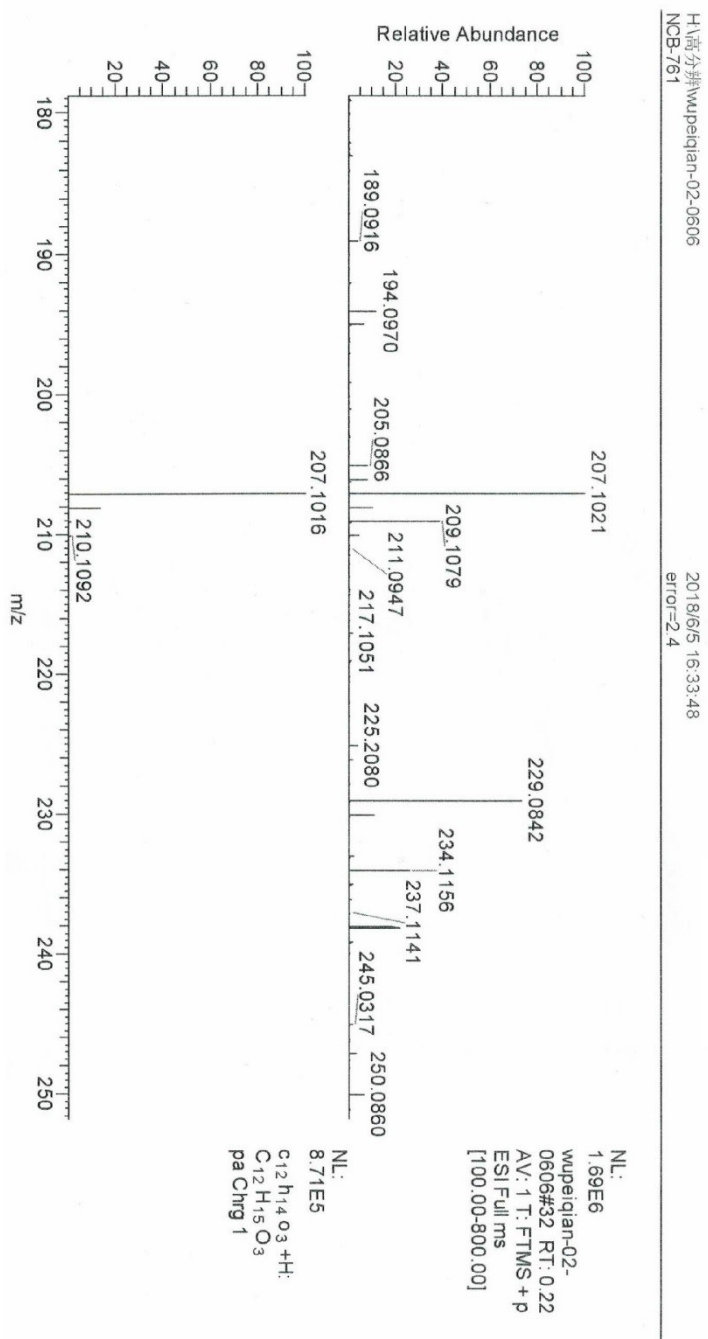

Fig. 24S IR spectrum of compound 3

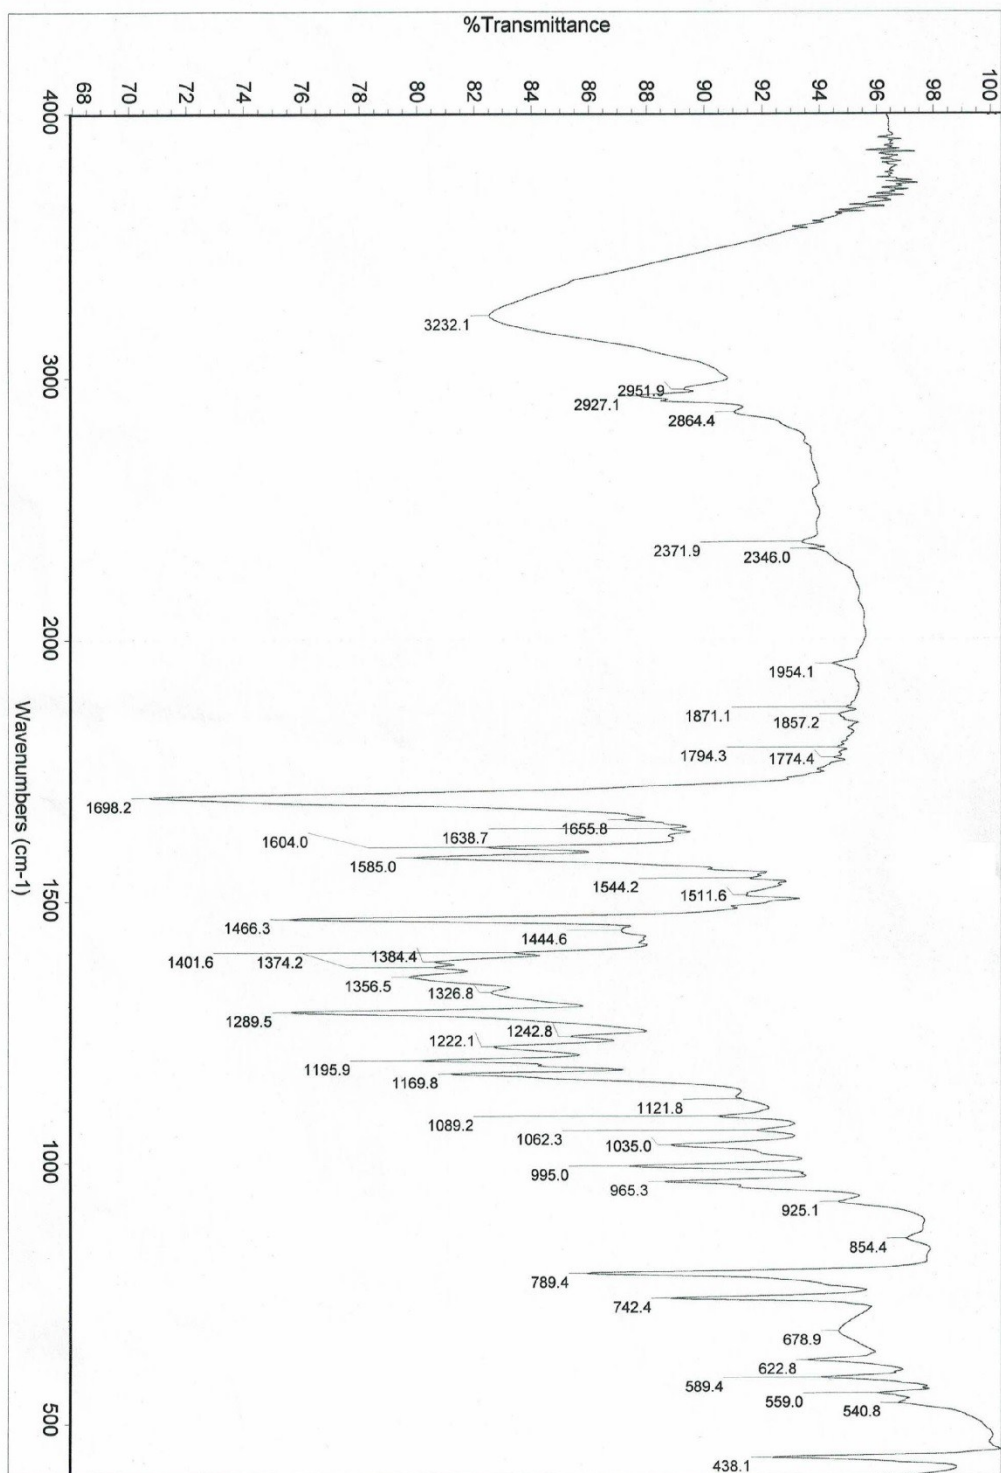

Fig. 25S <sup>1</sup>H NMR (600 MHz, CDCl<sub>3</sub>) of compound 4

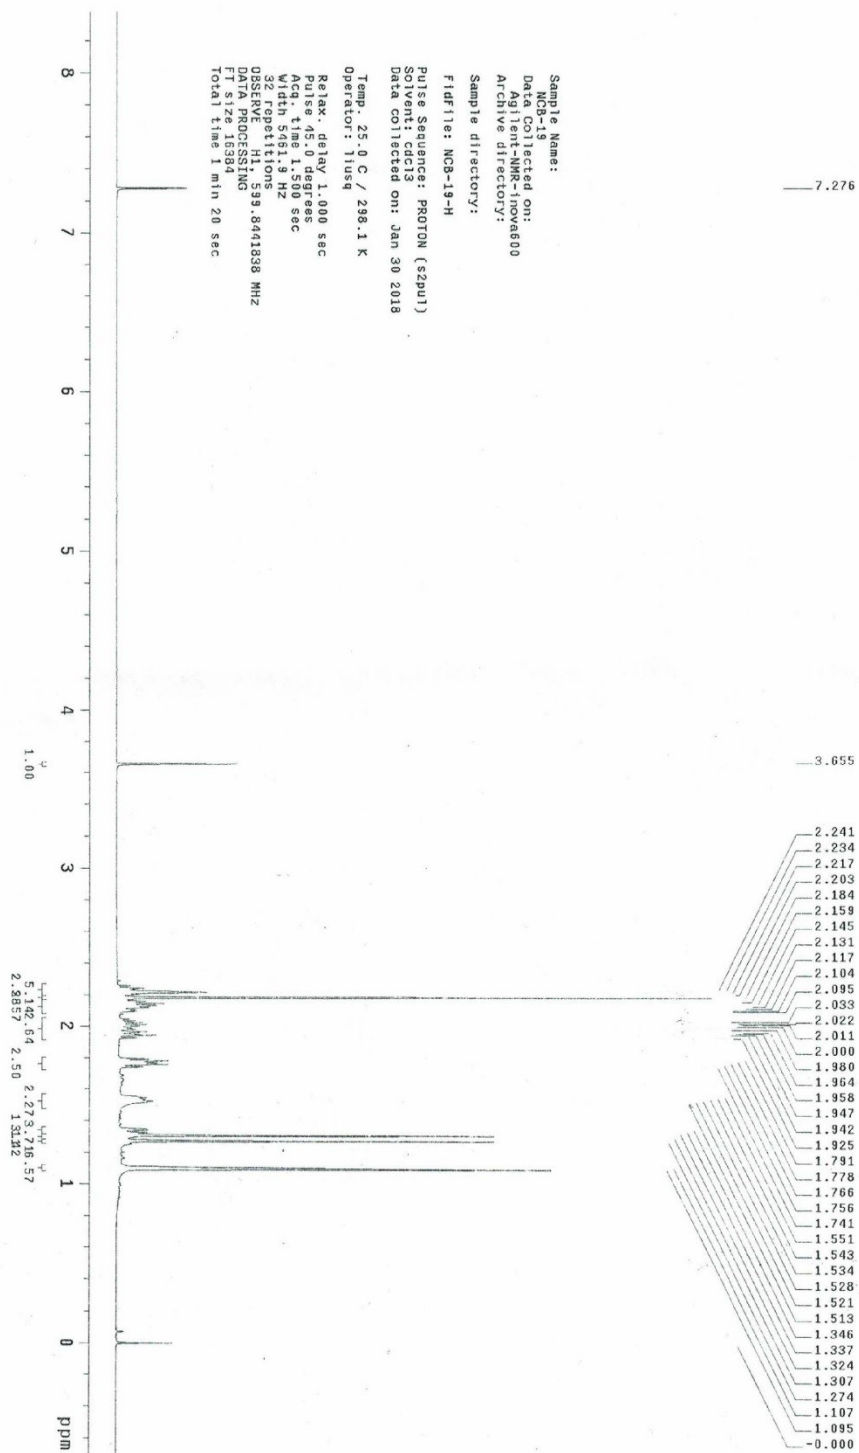

**Fig. 26S**  $^{13}\text{C}$  NMR and DEPT135 (150 MHz,  $\text{CDCl}_3$ ) of compound **4**

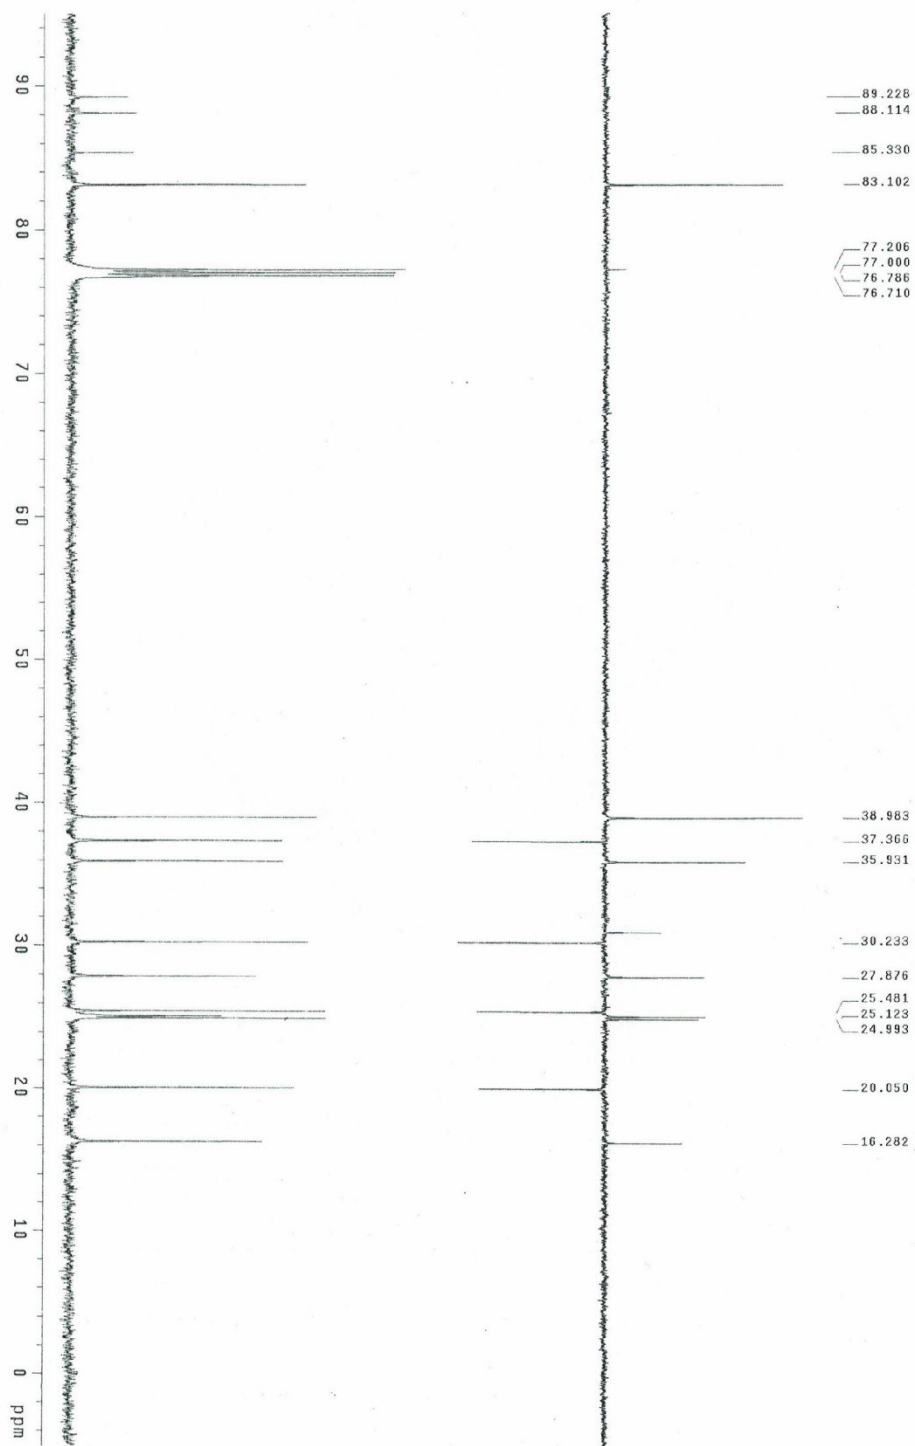

Fig. 27S  $^1\text{H}$ - $^1\text{H}$  COSY spectrum of compound 4

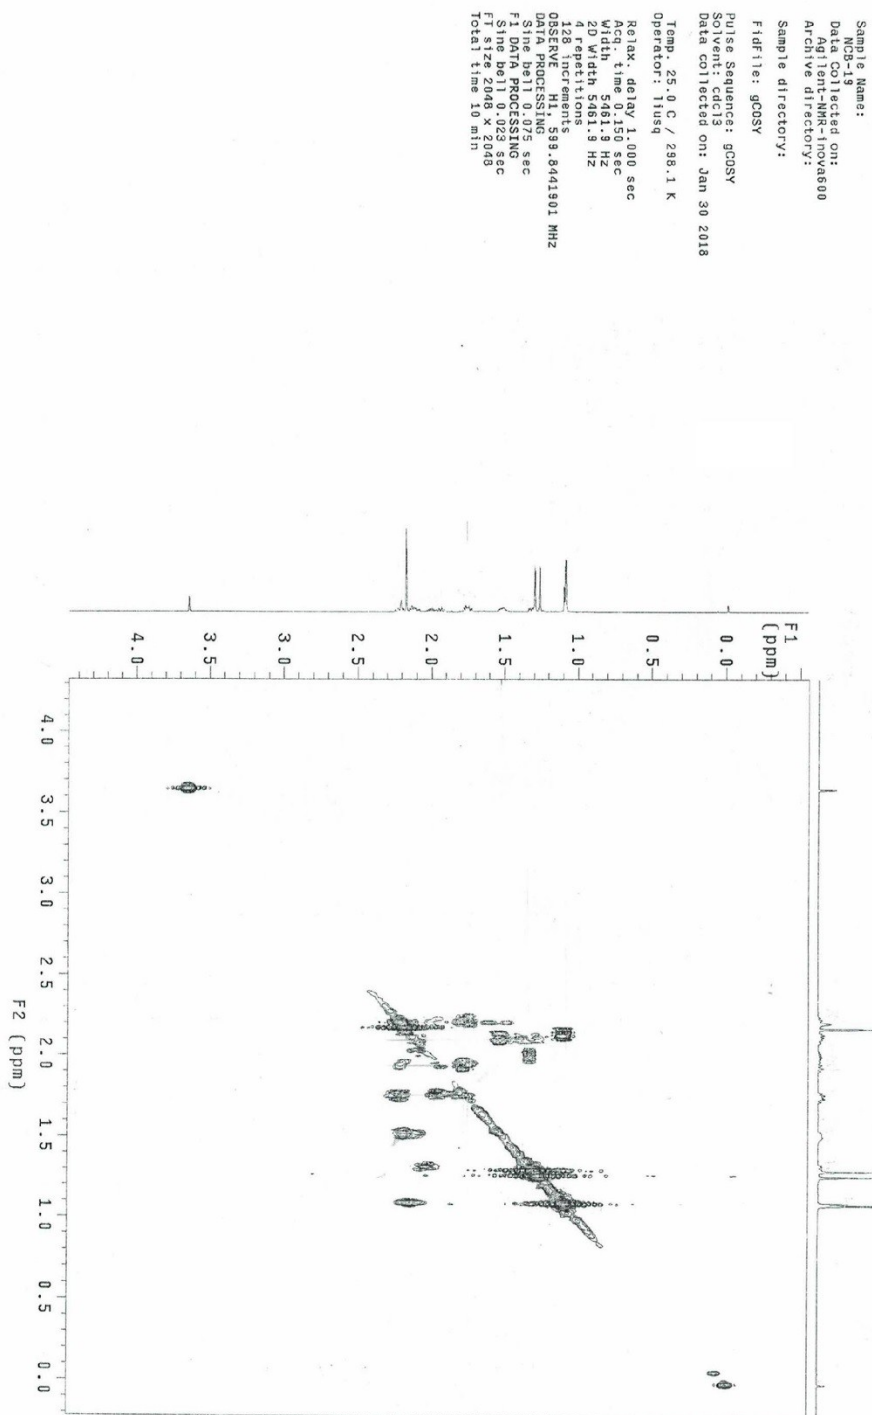

Fig. 28S HSQC spectrum of compound 4

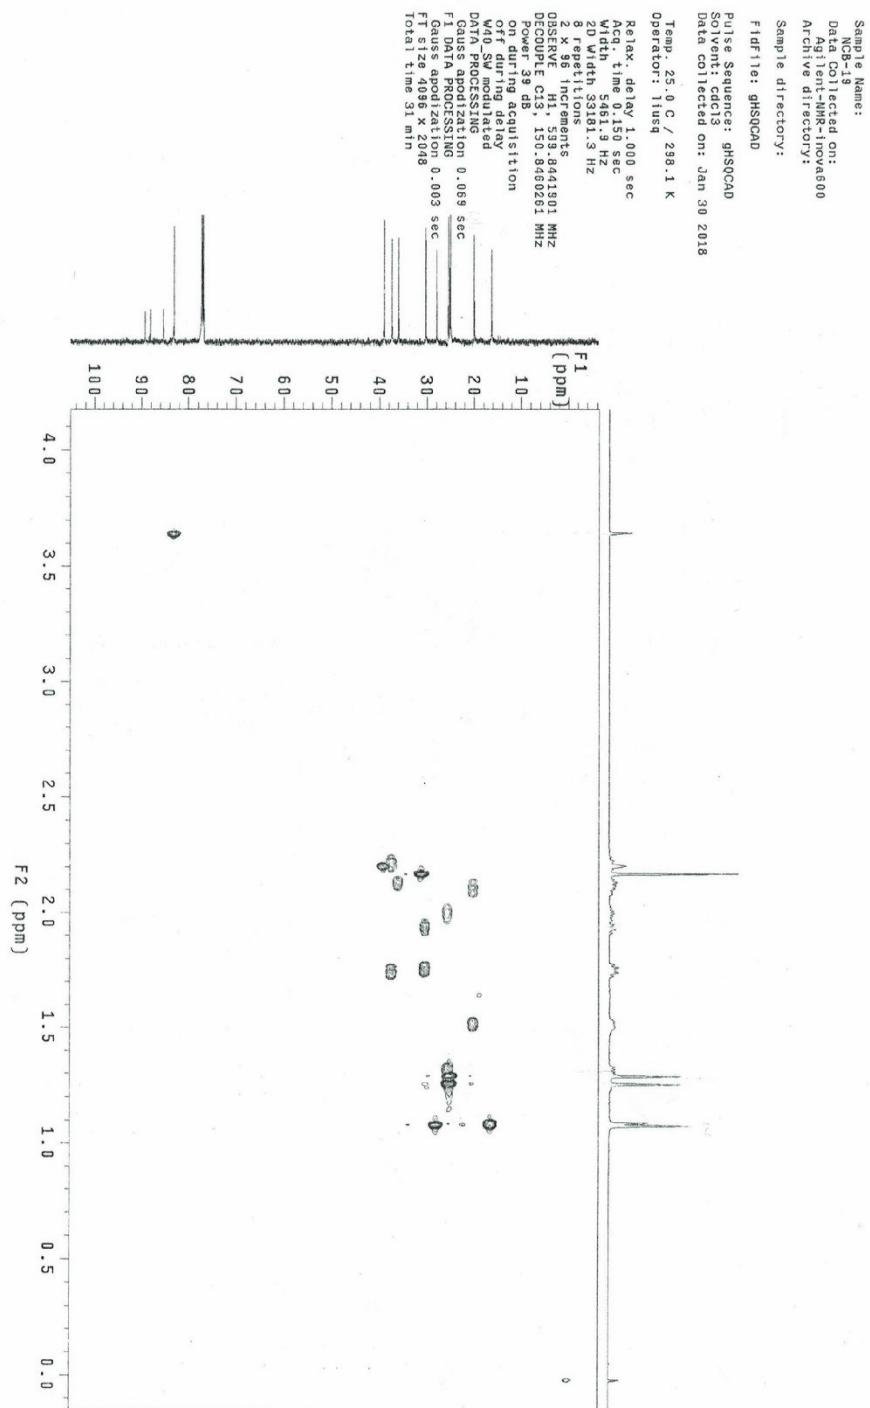

Fig. 29S HMBC spectrum of compound 4

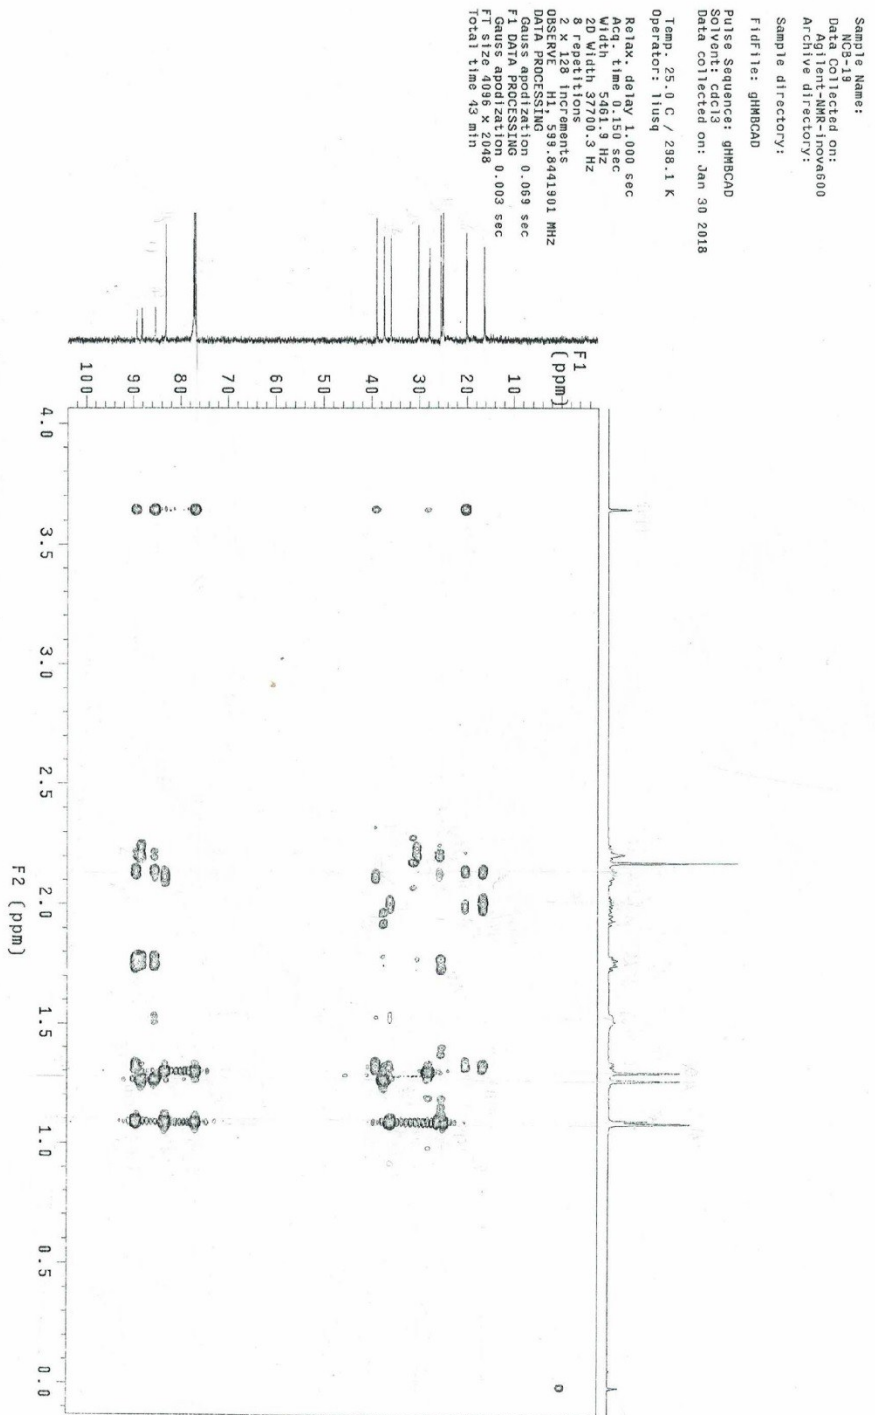



**Fig. 30S** NOESY spectrum of compound **4**

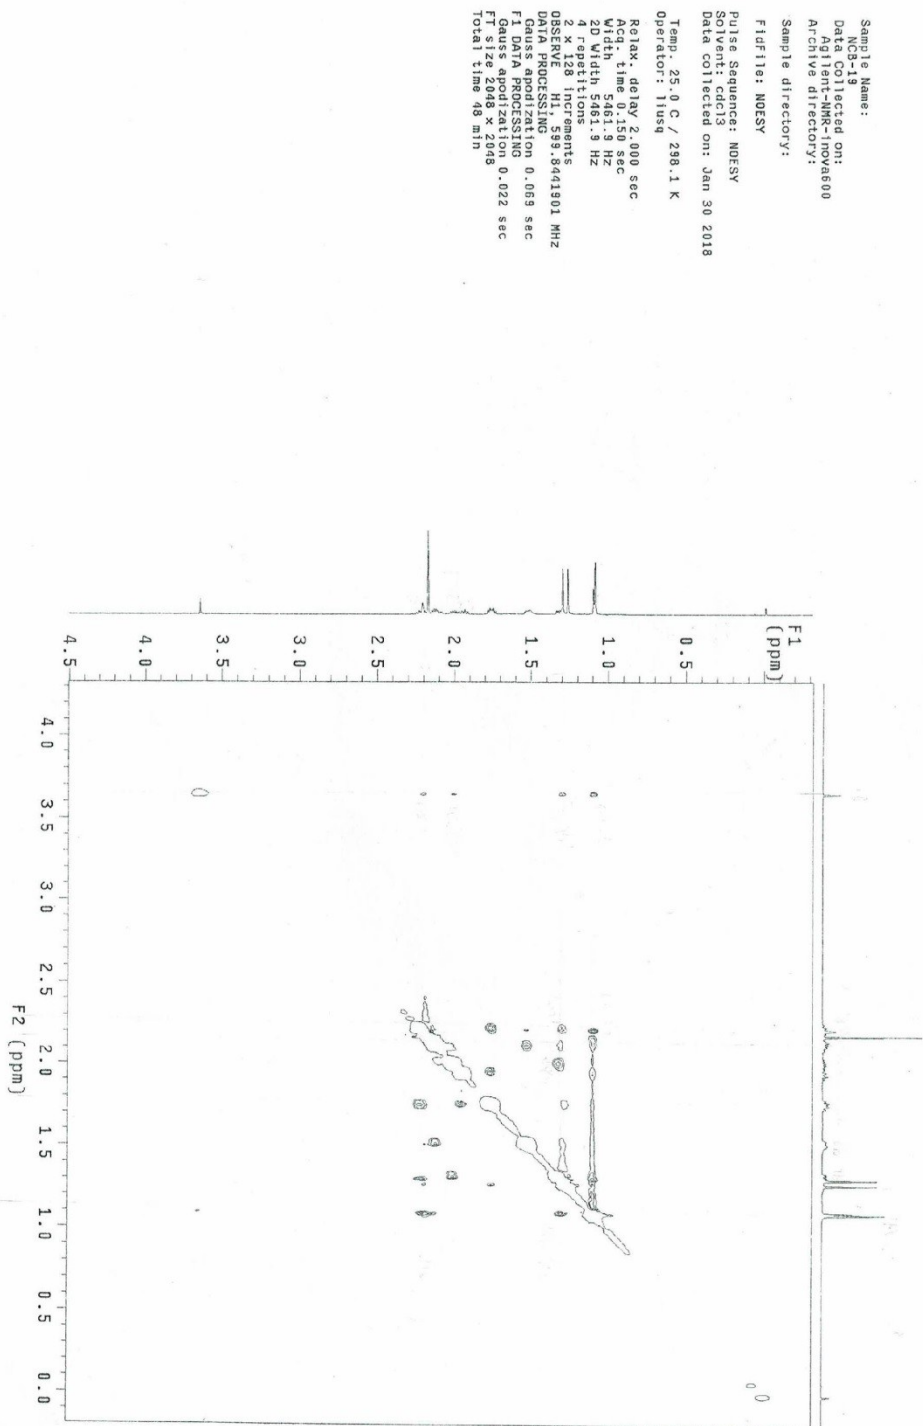

Fig. 31S HRESIMS spectrum of compound 4

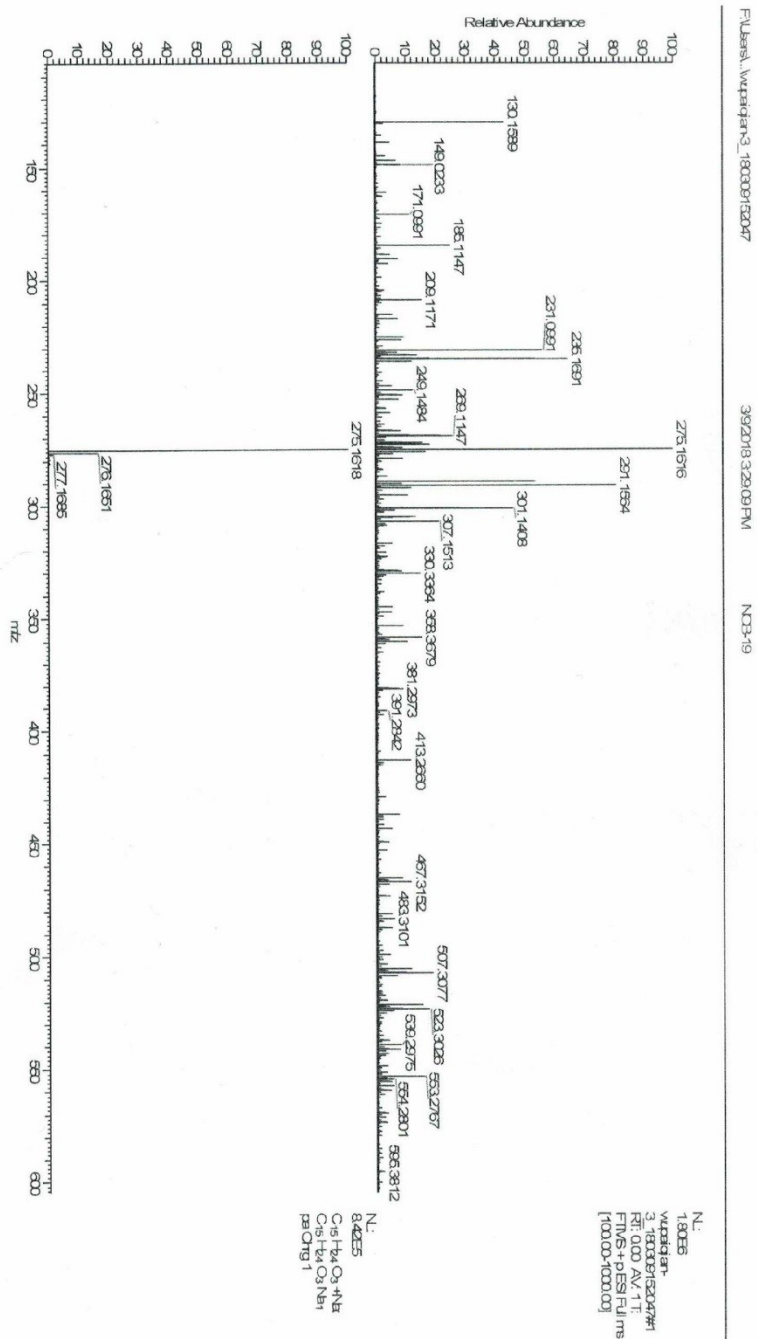

Fig. 32S IR spectrum of compound 4

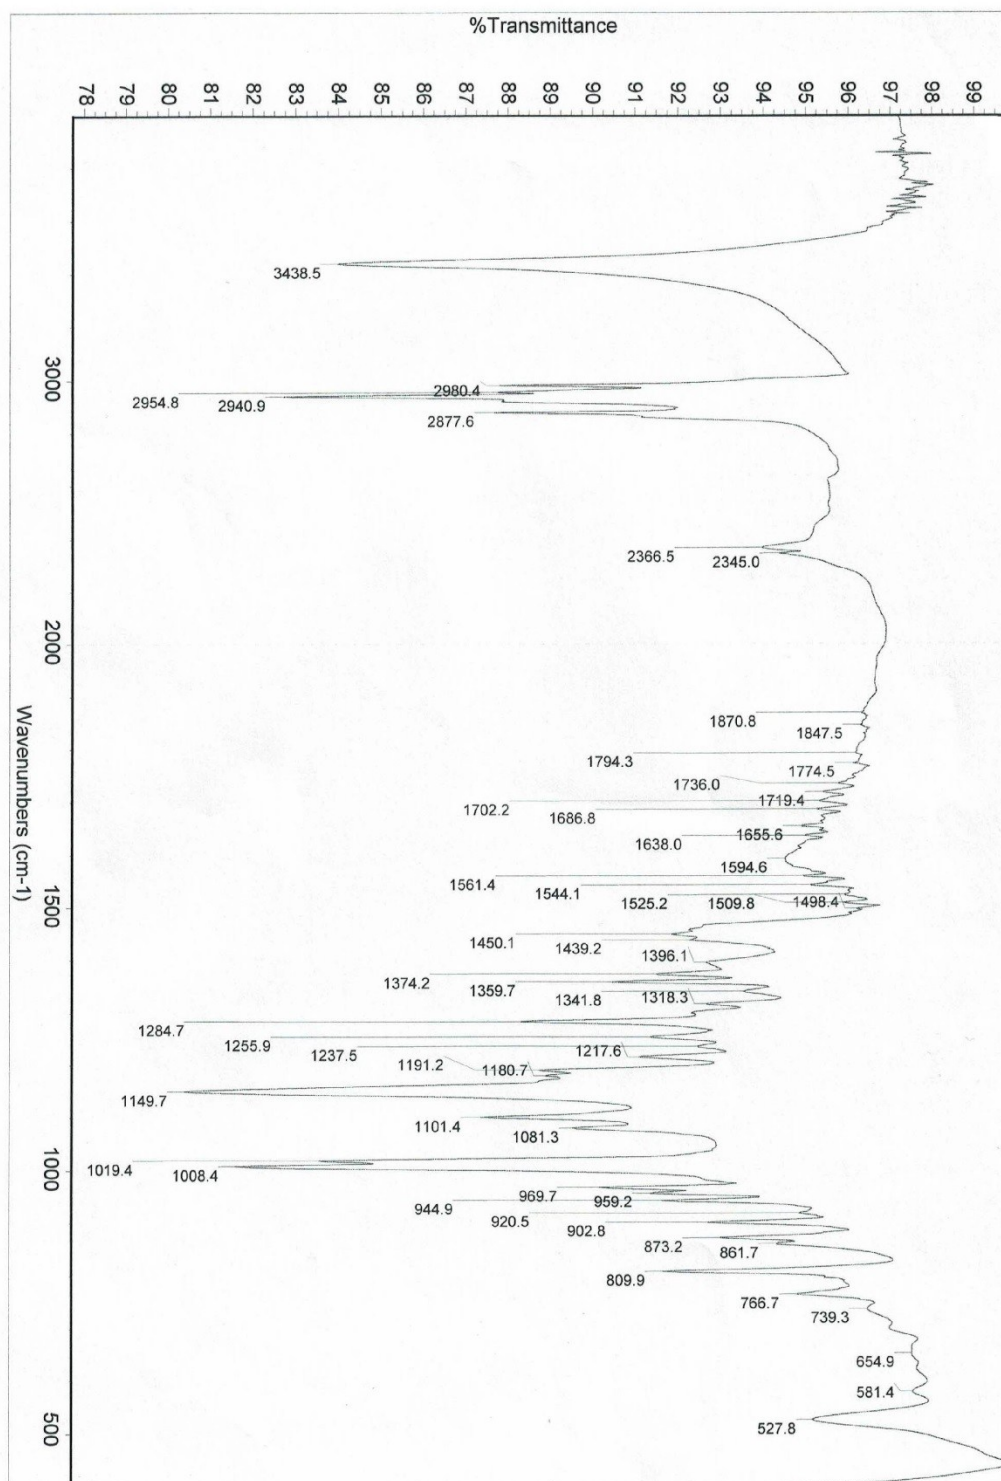

Supplement: c8ob02319k1.pdf [file c8ob02319k1.pdf]
